# Supplementary material
Source: Research Square preprint supplement (doi:10.21203/rs.3.rs-9271862/v1)
Supplement: Supplementary file 1 [file 99e5e9fa87967ca80332373f.docx]

**Supplementary Materials**

Table S1. Water Sampling Sites, Fish sampling sites, Physicochemical Parameters, and Isolate Identifications

| State | Water ID | Date/Time | Location | pH | Temperature (C) | Salinity (ppt) | TDS (ppm) | Conductivity (uS) | Isolates ID |
| --- | --- | --- | --- | --- | --- | --- | --- | --- | --- |
| Michigan | C1 | 10/3/23 13:25 | Cadillac Lake, Cadillac, MI  44°14'01.9"N 85°26'58.1"W | 8.44 | 20.7 | 0.09 | 92.9 | 185.9 | C1-1 |
| Michigan | C2 | 10/3/23 13:25 | Cadillac Lake, Cadillac, MI  44°14'04.2"N 85°26'58.1"W | 8.07 | 20.7 | 0.08 | 93 | 185.3 | C2-1  C2-2 |
| Michigan | HB1 | 10/3/23 18:00 | Harvey Iron Pony Truss Bridge, Buckley, MI  44°26'20.8"N 85°38'31.5"W | 8.63 | 16.2 | 0.17 | 167 | 337 | HB1-2 |
| Michigan | HB2 | 10/3/23 18:10 | Harvey Iron Pony Truss Bridge, Buckley, MI  44°26'20.8"N 85°38'31.5"W | 8.52 | 16.1 | 0.16 | 169 | 338 | HB2-2 |
| Michigan | B1 | 10/4/23 15:20 | Boardman River (Boardman Weir), Traverse City, MI 44°45'52.8"N 85°37'36.9"W | -7.2 | 18.1 | 0.21 | 207 | 424 | B1-2 |
| Michigan | B2 | 10/4/23 15:30 | Boardman River (Boardman Weir), Traverse City, MI 44°45'53.0"N 85°37'37.1"W | 7.56 | 17.8 | 0.21 | 212 | 425 | B2-1 |
| Michigan | B3 | 10/4/23 15:40 | Boardman River (Boardman Weir), Traverse City, MI 44°45'52.8"N 85°37'37.1"W | -7.3 | 18 | 0.21 | 211 | 423 | B3-2  B3-3 |
| Michigan | B5 | 10/4/23 16:00 | Boardman River, Traverse City, MI 44°45'51.9"N 85°37'36.4"W | 6.27 | 17.6 | 0.21 | 205 | 420 | B5-1  B5-2  B5-3 |
| Michigan | B6 | 10/4/23 16:10 | Boardman River, Traverse City, MI  44°45'53.9"N 85°37'37.4"W | - | 17.6 | 0.21 | 213 | 435 | B6-1 |
| Michigan | TB1 | 10/4/23 18:00 | Lake Michigan (near West Arm Grand Traverse Bay), Traverse City, MI 44°46'11.6"N 85°38'03.7"W | - | 16.9 | 0.14 | 149 | 300 | TB1-1 |
| Michigan | LP1 | 10/5/23 8:30 | Lake Michigan (near Lions Pavilion), Manistee, MI 44°14'53.4"N 86°20'27.2"W | - | 17.9 | 0.17 | 176 | 354 | LP1-1  LP1-2 |
| Michigan | LP2 | 10/5/23 8:40 | Lake Michigan (near Lions Pavilion), Manistee, MI 44°14'51.4"N 86°20'25.9"W | - | 18.1 | 0.18 | 180 | 361 | LP2-1  LP2-2 |
| Michigan | WC2 | 10/5/23 13:50 | Lake White Cloud (after dam), White Cloud, MI 43°32'46.5"N 85°46'02.4"W | - | 17.7 | 0.2 | 193 | 383 | WC2-1  WC2-2 |
| Michigan | WC3 | 10/5/23 14:00 | Lake White Cloud (after dam/raceway), White Cloud, MI 43°32'49.3"N 85°46'06.0"W | - | 16.9 | 0.19 | 195 | 391 | WC3-1 |
| Michigan | MR1 | 10/5/23 15:42 | Muskegon River, Newaygo, MI 43°25'09.9"N 85°47'27.2"W | - | 18.8 | 0.21 | 206 | 412 | MR1-1 |
| Michigan | MR2 | 10/5/23 15:50 | Muskegon River, Newaygo, MI 43°25'07.9"N 85°47'23.5"W | - | 18.3 | 0.21 | 206 | 415 | MR2-1  MR2-2 |
| Michigan | MR3 | 10/5/23 16:10 | Muskegon River, Newaygo, MI (fish stocking release site) 43°25'24.4"N 85°40'30.9"W | - | 18.8 | 0.21 | 208 | 346 | MR3-2 |
| Ohio | GY/YPS | 8/17/23 12:30 | Bowling Green State University Greenhouse, Bowling Green, OH 41°22'56.7"N 83°38'23.2"W | 6.5 | 19.2 | - | - | - | GY1, GY2-1, GY2-2, GY4, YPS1, YPS3, YPS4 |
| Ohio | SFP | 11/7/23 | Bowling Green Pond, Bowling Green, OH  41°21'13.4"N 83°37'08.8"W | - | - | - | - | - | SPF1 |
| Indiana | W4 | 1/30/24 | Richard Clay Bodine State Fish Hatchery (fish tanks), Mishawaka, IN  41°40'15.1"N 86°07'29.6"W | 6.35 | 12.4 | 0.36 | 342 | 705 | W4-3 |
| Michigan | LakC | 4/14/24 | Lake Chemung, Brighton, MI  42°34'41.2"N 83°50'18.1"W | 7 | 14 | - | - | - | LakC1  LakC3  LakC4 |
| Ohio | GR1 | 4/17/24 8:17 | Grand River, Fairport Harbor, OH  41°44'25.1"N 81°15'46.3"W | 6.5 | 13.8 | 0.09 | 92.4 | 187.5 | GR1-1  GR1-2 |
| Ohio | GR2 | 4/17/24 8:25 | Grand River, Fairport Harbor, OH 41°44'24.7"N 81°15'46.5"W | 6.5 | 13.8 | 0.08 | 95.5 | 191.5 | GR2-3 |
| Ohio | FH2 | 4/17/24 13:25 | Lake Erie, Fairport Harbor, OH 41°45'32.5"N 81°16'43.2"W | 6.5 | 13.8 | 0.11 | 115 | 239 | FH2-1 |
| Ohio | D1 | 4/17/24 15:42 | Cloverdale Lake, Concord Township, OH 41°41'19.2"N 81°14'20.9"W | 6.5 | 18.4 | 0.19 | 188 | 383 | D1-1 |
| Ohio | D2 | 4/17/24 15:44 | Cloverdale Lake, Concord Township, OH  41°41'19.2"N 81°14'20.9"W | 6.5 | 19.1 | 0.25 | 230 | 480 | D2-3  D2-4 |
| Ohio | D3 | 4/17/24 15:47 | Cloverdale Lake, Concord Township, OH 41°41'19.2"N 81°14'20.9"W | 6.5 | 17.7 | 0.21 | 201 | 430 | D3-1 |
| Ohio | TIR44  (fish sample) | 4/17/24 | Fairport Harbor Fisheries Research Station, Fairport Harbor, OH 41°44'30.3"N 81°16'18.6"W | - | - | - | - | - | TIR44-1 |
| Ohio | Tag49  (fish sample) | 4/17/24 | Fairport Harbor Fisheries Research Station, Fairport Harbor, OH 41°44'30.3"N 81°16'18.6"W | - | - | - | - | - | Tag49-1 |

**Table S2.** Species identification of 47 isolates using ITS and COX1 markers, with concordance analysis.

| Isolates ID | Species based on ITS | ITS Accession Number | ID by COX1 | COX1 Accession Number |
| --- | --- | --- | --- | --- |
| **GY1** | ***Saprolegnia ferax*** | **PX612137** | ***Saprolegnia ferax*** | **PX757084** |
| **GY2-1** | ***Saprolegnia ferax*** | **PX612138** | ***Saprolegnia ferax*** | **PX757085** |
| **GY2-2** | ***Saprolegnia ferax*** | **PX612139** | ***Saprolegnia ferax*** | **PX757086** |
| **GY04** | ***Saprolegnia ferax*** | **PX612140** | ***Saprolegnia ferax*** | **PX757087** |
| **YPS1** | ***Saprolegnia ferax*** | **PX612141** | ***Saprolegnia ferax*** | **PX757110** |
| **YPS3** | ***Saprolegnia ferax*** | **PX612142** | ***Saprolegnia ferax*** | **PX757111** |
| **YPS04** | ***Saprolegnia ferax*** | **PX612143** | ***Saprolegnia ferax*** | **PX757112** |
| **C1-1** | ***Scoliolegnia asterophora*** | **PX612097** | ***Scoliolegnia asterophora*** | **PX757072** |
| **C2-1** | ***Scoliolegnia asterophora*** | **PX612098** | ***Scoliolegnia asterophora*** | **PX757073** |
| **C2-2** | ***Scoliolegnia asterophora*** | **PX612099** | ***Scoliolegnia asterophora*** | **PX757074** |
| **HB1-2** | ***Saprolegnia delica*** | **PX612124** | ***Saprolegnia delica*** | **PX757088** |
| **HB2-2** | ***Saprolegnia australis*** | **PX612103** | ***Saprolegnia ferax*** | **PX757089** |
| **B1-2** | ***Saprolegnia ferax*** | **PX612130** | ***Saprolegnia ferax*** | **PX757064** |
| **B2-1** | ***Saprolegnia australis*** | **PX612100** | ***Saprolegnia ferax*** | **PX757065** |
| **B3-2** | ***Saprolegnia ferax*** | **PX612134** | ***Saprolegnia ferax*** | **PX757066** |
| **B3-3** | ***Scoliolegnia asterophora*** | **PX612095** | ***Scoliolegnia asterophora*** | **PX757067** |
| **B5-1** | ***Saprolegnia parasitica*** | **PX612045** | ***Saprolegnia delica*** | **PX757068** |
| **B5-2** | ***Saprolegnia salmonis*** | **PX612076** | ***Saprolegnia delica*** | **PX757069** |
| **B5-3** | ***Scoliolegnia asterophora*** | **PX612096** | ***Scoliolegnia asterophora*** | **PX757070** |
| **B6-1** | ***Saprolegnia australis*** | **PX612101** | ***Saprolegnia ferax*** | **PX757071** |
| **TB1-1** | ***Saprolegnia australis*** | **PX612104** | ***Saprolegnia ferax*** | **PX757104** |
| **LP1-1** | ***Saprolegnia delica*** | **PX612125** | ***Saprolegnia ferax*** | **PX757093** |
| **LP1-2** | ***Saprolegnia australis*** | **PX612106** | ***Saprolegnia ferax*** | **PX757094** |
| **LP2-1** | ***Saprolegniaceae sp.*** | **PX612168** | ***Saprolegniaceae sp.*** | **PX757095** |
| **LP2-2** | ***Saprolegnia australis*** | **PX612107** | ***Saprolegnia ferax*** | **PX757096** |
| **WC2-1** | ***Saprolegnia longicaulis*** | **PX612084** | ***Saprolegnia ferax*** | **PX757107** |
| **WC2-2** | ***Saprolegnia ferax*** | **PX612135** | ***Saprolegnia ferax*** | **PX757108** |
| **WC3-1** | ***Saprolegnia parasitica*** | **PX612046** | ***Saprolegnia hypogyna*** | **PX757109** |
| **MR1-1** | ***Saprolegnia delica*** | **PX612126** | ***Saprolegnia ferax*** | **PX757097** |
| **MR2-1** | ***Saprolegnia parasitica*** | **PX612047** | ***Saprolegnia delica*** | **PX757098** |
| **MR2-2** | ***Saprolegnia ferax*** | **PX612136** | ***Saprolegnia ferax*** | **PX757099** |
| **MR3-2** | ***Saprolegnia australis*** | **PX612110** | ***Saprolegnia ferax*** | **PX757100** |
| **SFP1** | ***Saprolegnia ferax*** | **PX612160** | ***Saprolegnia ferax*** | **PX757102** |
| **W4-3** | ***Saprolegnia australis*** | **PX612109** | ***Saprolegnia ferax*** | ***PX757106*** |
| **LakC1** | ***Scoliolegnia asterophora*** | **PX612170** | ***Scoliolegnia asterophora*** | **PX757090** |
| **LakC3** | ***Saprolegnia australis*** | **PX612111** | ***Saprolegnia delica*** | **PX757091** |
| **LakC4** | ***Saprolegnia hypogyna*** | **PX612079** | ***Saprolegnia hypogena*** | **PX757092** |
| **FH2-1** | ***Saprolegnia parasitica*** | **PX612054** | ***Saprolegnia delica*** | **PX757079** |
| **GR1-1** | ***Saprolegnia ferax*** | **PX612145** | ***Saprolegnia ferax*** | **PX757080** |
| **GR1-2** | ***Saprolegnia terrestris*** | **PX612169** | ***Saprolegnia terrestris*** | **PX757081** |
| **GR2-3** | ***Saprolegnia ferax*** | **PX612146** | ***Saprolegnia ferax*** | **PX757083** |
| **TIR44-1** | ***Saprolegnia parasitica*** | **PX612055** | ***Saprolegnia delica*** | **PX757105** |
| **Tag49-1** | ***Saprolegnia diclina*** | **PX612132** | ***Saprolegnia diclina*** | **PX757103** |
| **D1-1** | ***Saprolegnia ferax*** | **PX612147** | ***Saprolegnia ferax*** | **PX757075** |
| **D2-3** | ***Saprolegnia sp.*** | **PX612162** | ***Scoliolegnia asterophora*** | **PX757076** |
| **D2-4** | ***Saprolegnia hypogyna*** | **PX612081** | ***Saprolegnia hypogyna*** | **PX757077** |
| **D3-1** | ***Saprolegnia sp.*** | **PX612163** | ***Achlya sp.*** | **PX757078** |

Table S3. Oomycete isolates recovered from each site (Identification based on ITS region)

| Location | *S. parasitica* | *S. ferax* | *S. australis* | *S. hypogena* | *S. delica* | *S. diclina* | *S. salmonis* | *S. longicaulis* | *Scoliolegnia asterophora* | *S. sp* | *Saprolegniaceae sp.* | *S. terrestris* |
| --- | --- | --- | --- | --- | --- | --- | --- | --- | --- | --- | --- | --- |
| Cadillac Lake, Cadillac, MI | **0** | **0** | **0** | **0** | **0** | **0** | **0** | **0** | **3** | **0** | **0** | **0** |
| Harvey Iron Pony Truss Bridge, Buckley, MI | **0** | **0** | **1** | **0** | **1** | **0** | **0** | **0** | **0** | **0** | **0** | **0** |
| Boardman River (Boardman Weir), Traverse City, MI | **1** | **2** | **2** | **0** | **0** | **0** | **1** | **0** | **2** | **0** | **0** | **0** |
| Lake Michigan (near West Arm Grand Traverse Bay), Traverse City, MI | **0** | **0** | **1** | **0** | **0** | **0** | **0** | **0** | **0** | **0** | **0** | **0** |
| Lake Michigan (near Lions Pavilion), Manistee, MI | **0** | **0** | **2** | **0** | **1** | **0** | **0** | **0** | **0** | **0** | **1** | **0** |
| Lake White Cloud (after dam/raceway), White Cloud, MI | **1** | **1** | **0** | **0** | **0** | **0** | **0** | **1** | **0** | **0** | **0** | **0** |
| Muskegon River, Newaygo, MI | **1** | **1** | **1** | **0** | **1** | **0** | **0** | **0** | **0** | **0** | **0** | **0** |
| Bowling Green Pond, Bowling Green, OH | **0** | **1** | **0** | **0** | **0** | **0** | **0** | **0** | **0** | **0** | **0** | **0** |
| Lake Chemung, Brighton, MI | **0** | **0** | **1** | **1** | **0** | **0** | **0** | **0** | **1** | **0** | **0** | **0** |
| Bowling Green State University Greenhouse, Bowling Green, OH | **0** | **7** | **0** | **0** | **0** | **0** | **0** | **0** | **0** | **0** | **0** | **0** |
| Lake Erie, Fairport Harbor, OH | **1** | **0** | **0** | **0** | **0** | **0** | **0** | **0** | **0** | **0** | **0** | **0** |
| Grand River, Fairport Harbor, OH | **0** | **2** | **0** | **0** | **0** | **0** | **0** | **0** | **0** | **0** | **0** | **1** |
| Fish fin wound from TIR44, OH | **1** | **0** | **0** | **0** | **0** | **0** | **0** | **0** | **0** | **0** | **0** | **0** |
| Fish fin wound from Tag49, OH | **0** | **0** | **0** | **0** | **0** | **1** | **0** | **0** | **0** | **0** | **0** | **0** |
| Cloverdale Lake, Concord Township, OH | **0** | **1** | **0** | **1** | **0** | **0** | **0** | **0** | **0** | **2** | **0** | **0** |
| Richard Clay Bodine State Fish Hatchery (fish tanks), Mishawaka, IN | **0** | **0** | **1** | **0** | **0** | **0** | **0** | **0** | **0** | **0** | **0** | **0** |
| Total | **5** | **15** | **9** | **2** | **3** | **1** | **1** | **1** | **6** | **2** | **1** | **1** |


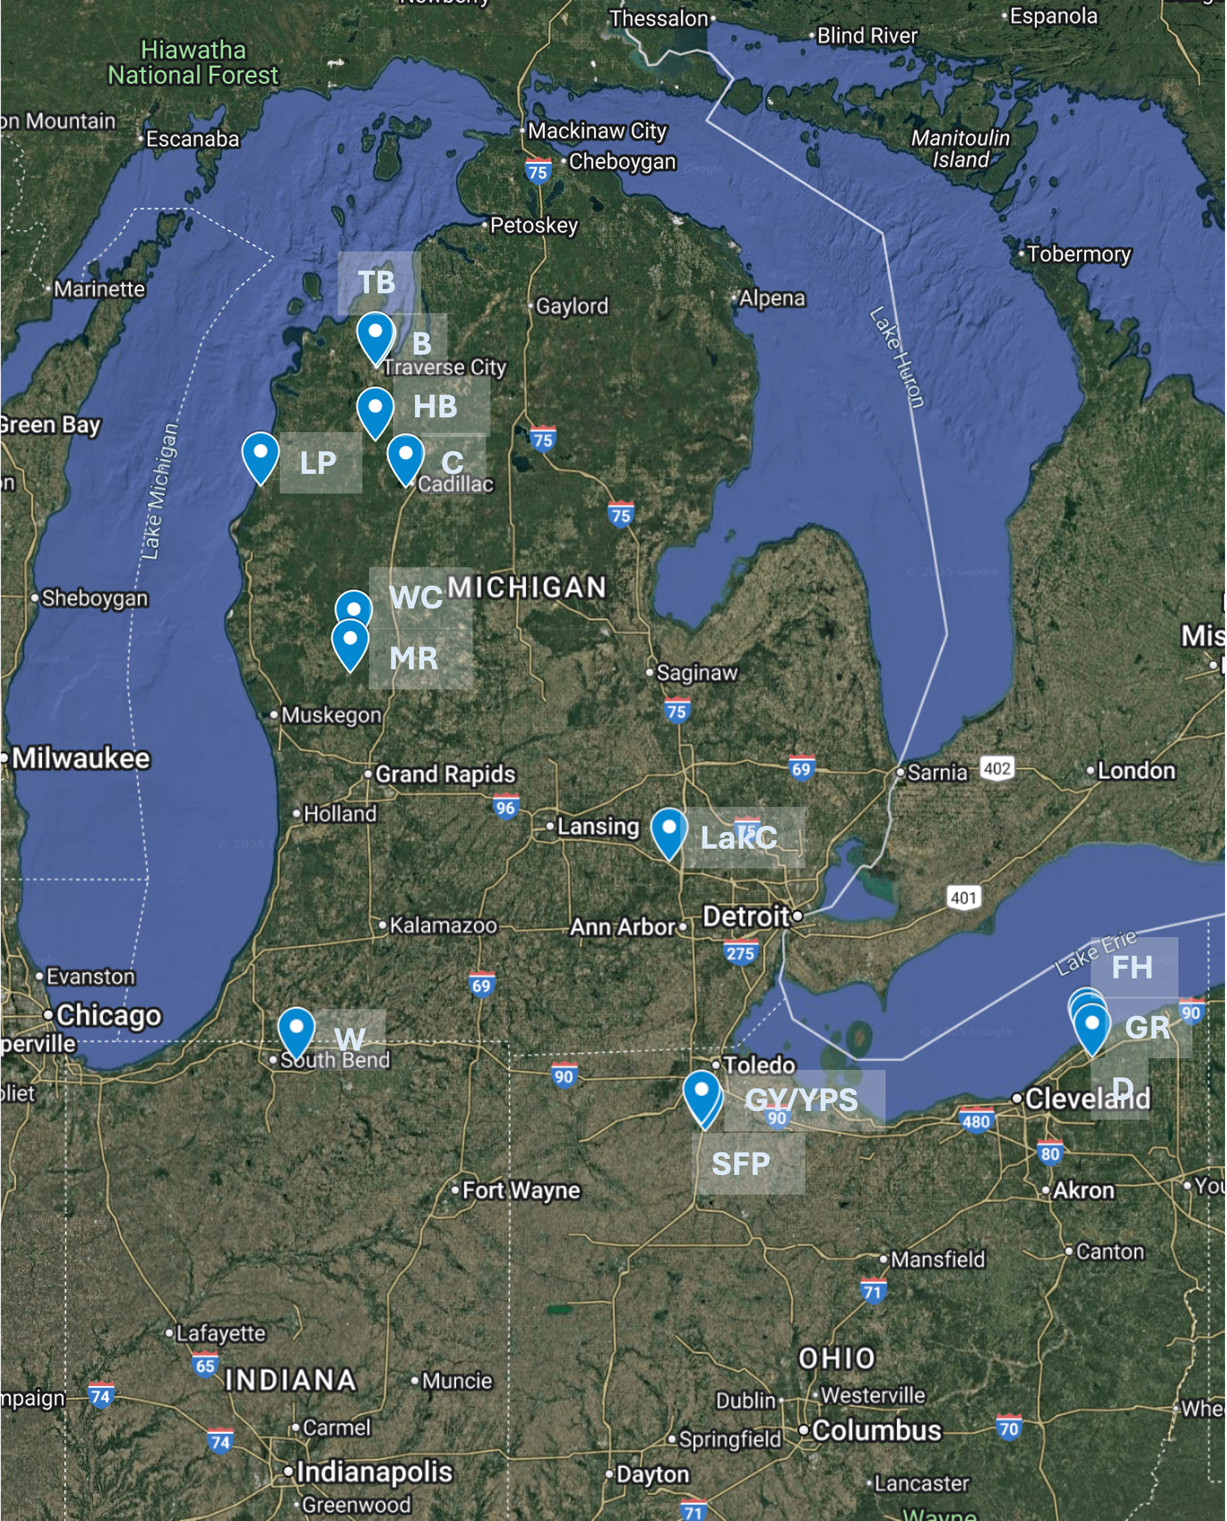


**Fig. S1** Sampling locations for *Saprolegnia* across Michigan, Ohio, and Indiana. Twenty-seven water samples and 2 fish tissue samples were collected from 14 sites. TB: Lake Michigan, Traverse City, MI; B: Boardman River, Traverse City, MI; HB: Harvey Iron Pony Truss Bridge, Buckley, MI; C: Cadillac Lake, Cadillac, MI; LP: Lake Michigan, Manistee, MI; WC: Lake White Cloud, White Cloud, MI; MR: Muskegon River, Newaygo, MI; LakC: Lake Chemung, Brighton, MI; W: Richard Clay Bodine State Fish Hatchery (fish tanks), Mishawaka, IN; GY/YPS: Bowling Green State University Greenhouse, Bowling Green, OH; SFP: Bowling Green Pond, Bowling Green, OH; FH: Lake Erie, Fairport Harbor, OH; GR: Grand River, Fairport Harbor, OH; D: Cloverdale Lake, Concord Township, OH. Precise geographical coordinates and landmarks for all sites are provided in Table S1.


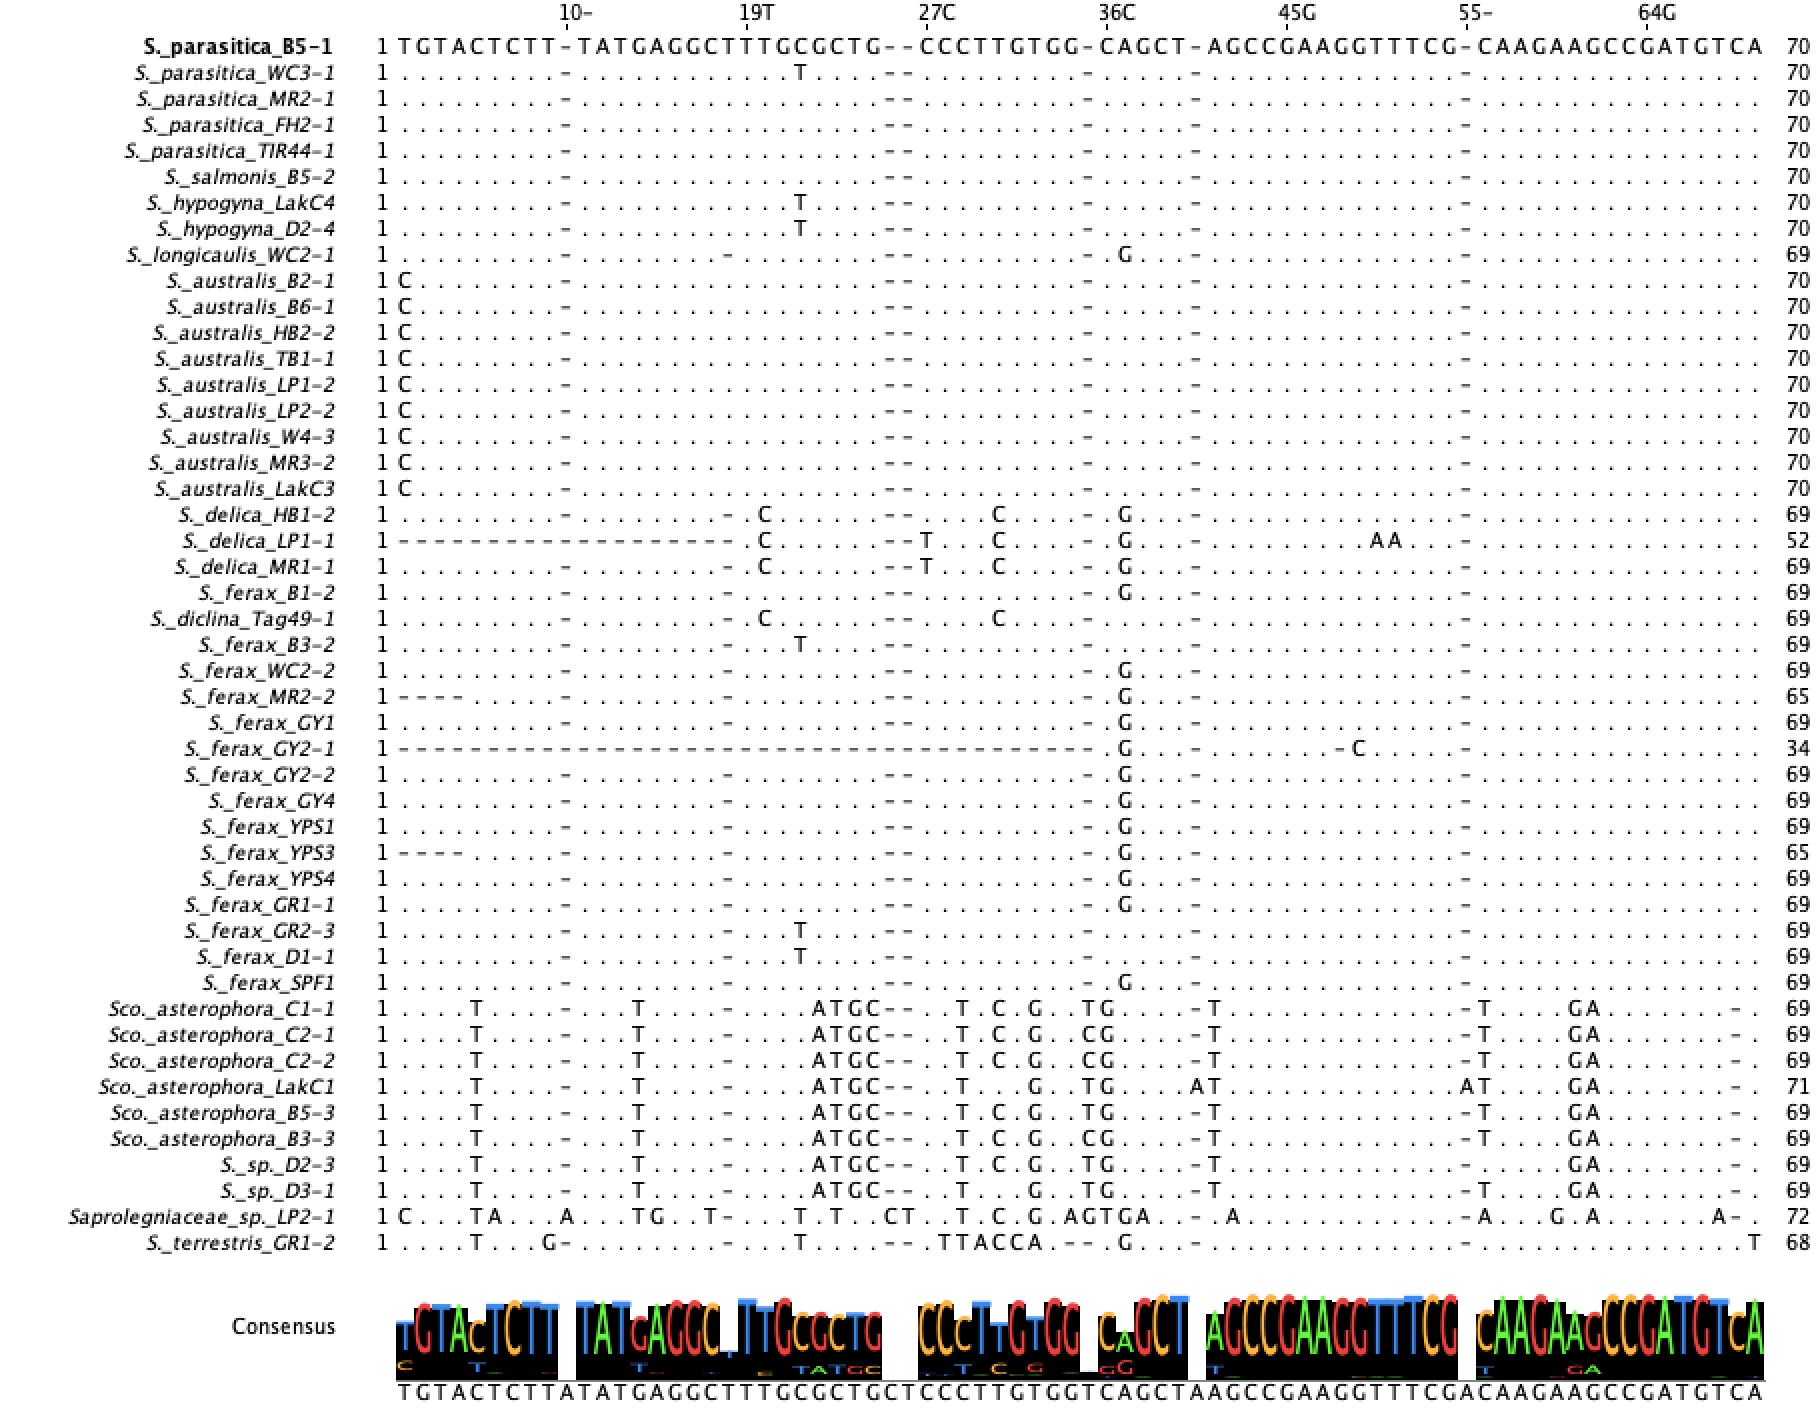


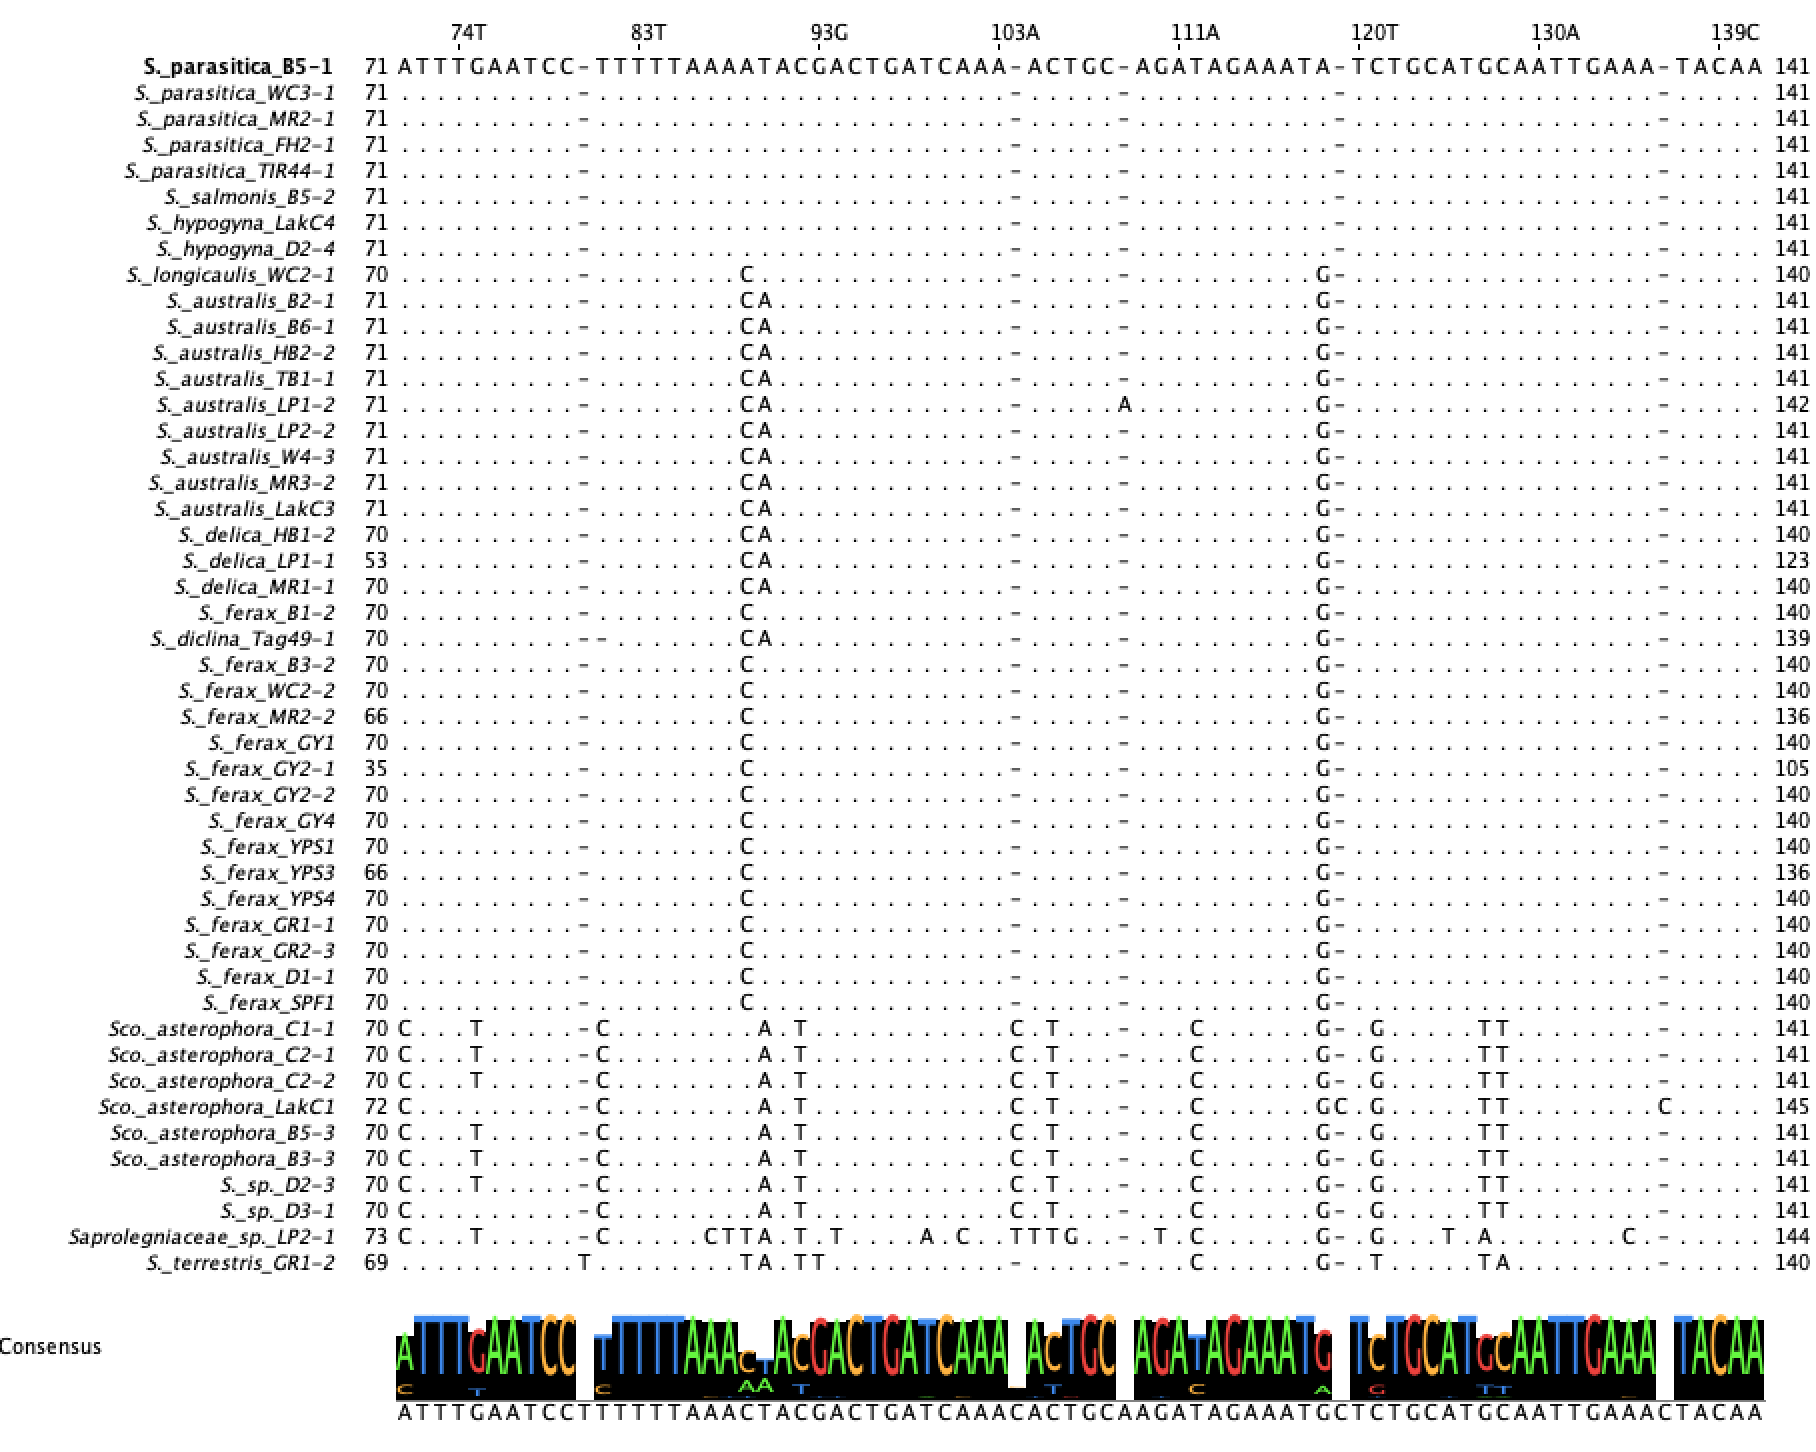


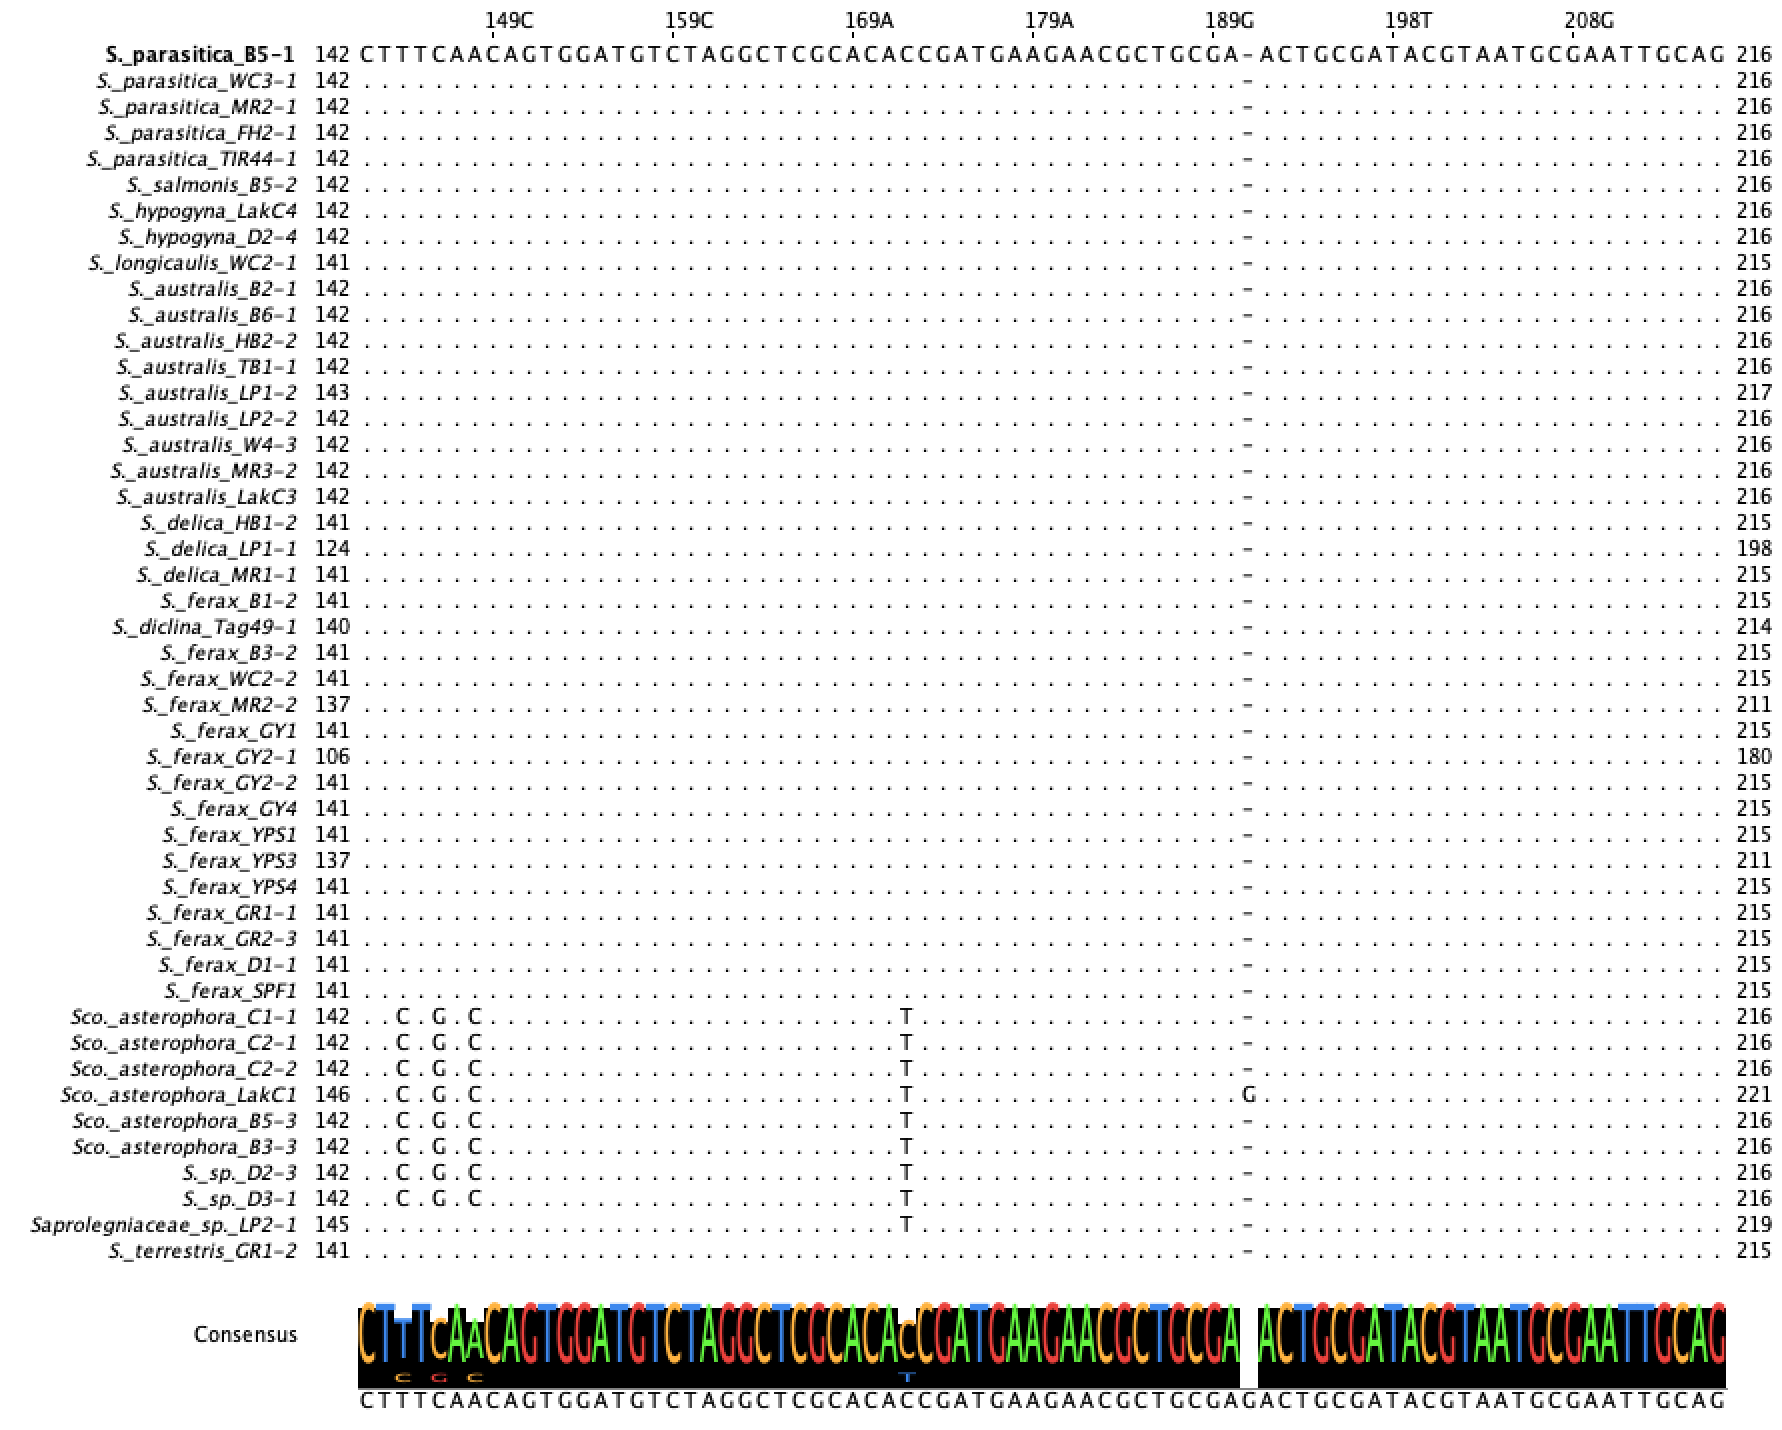


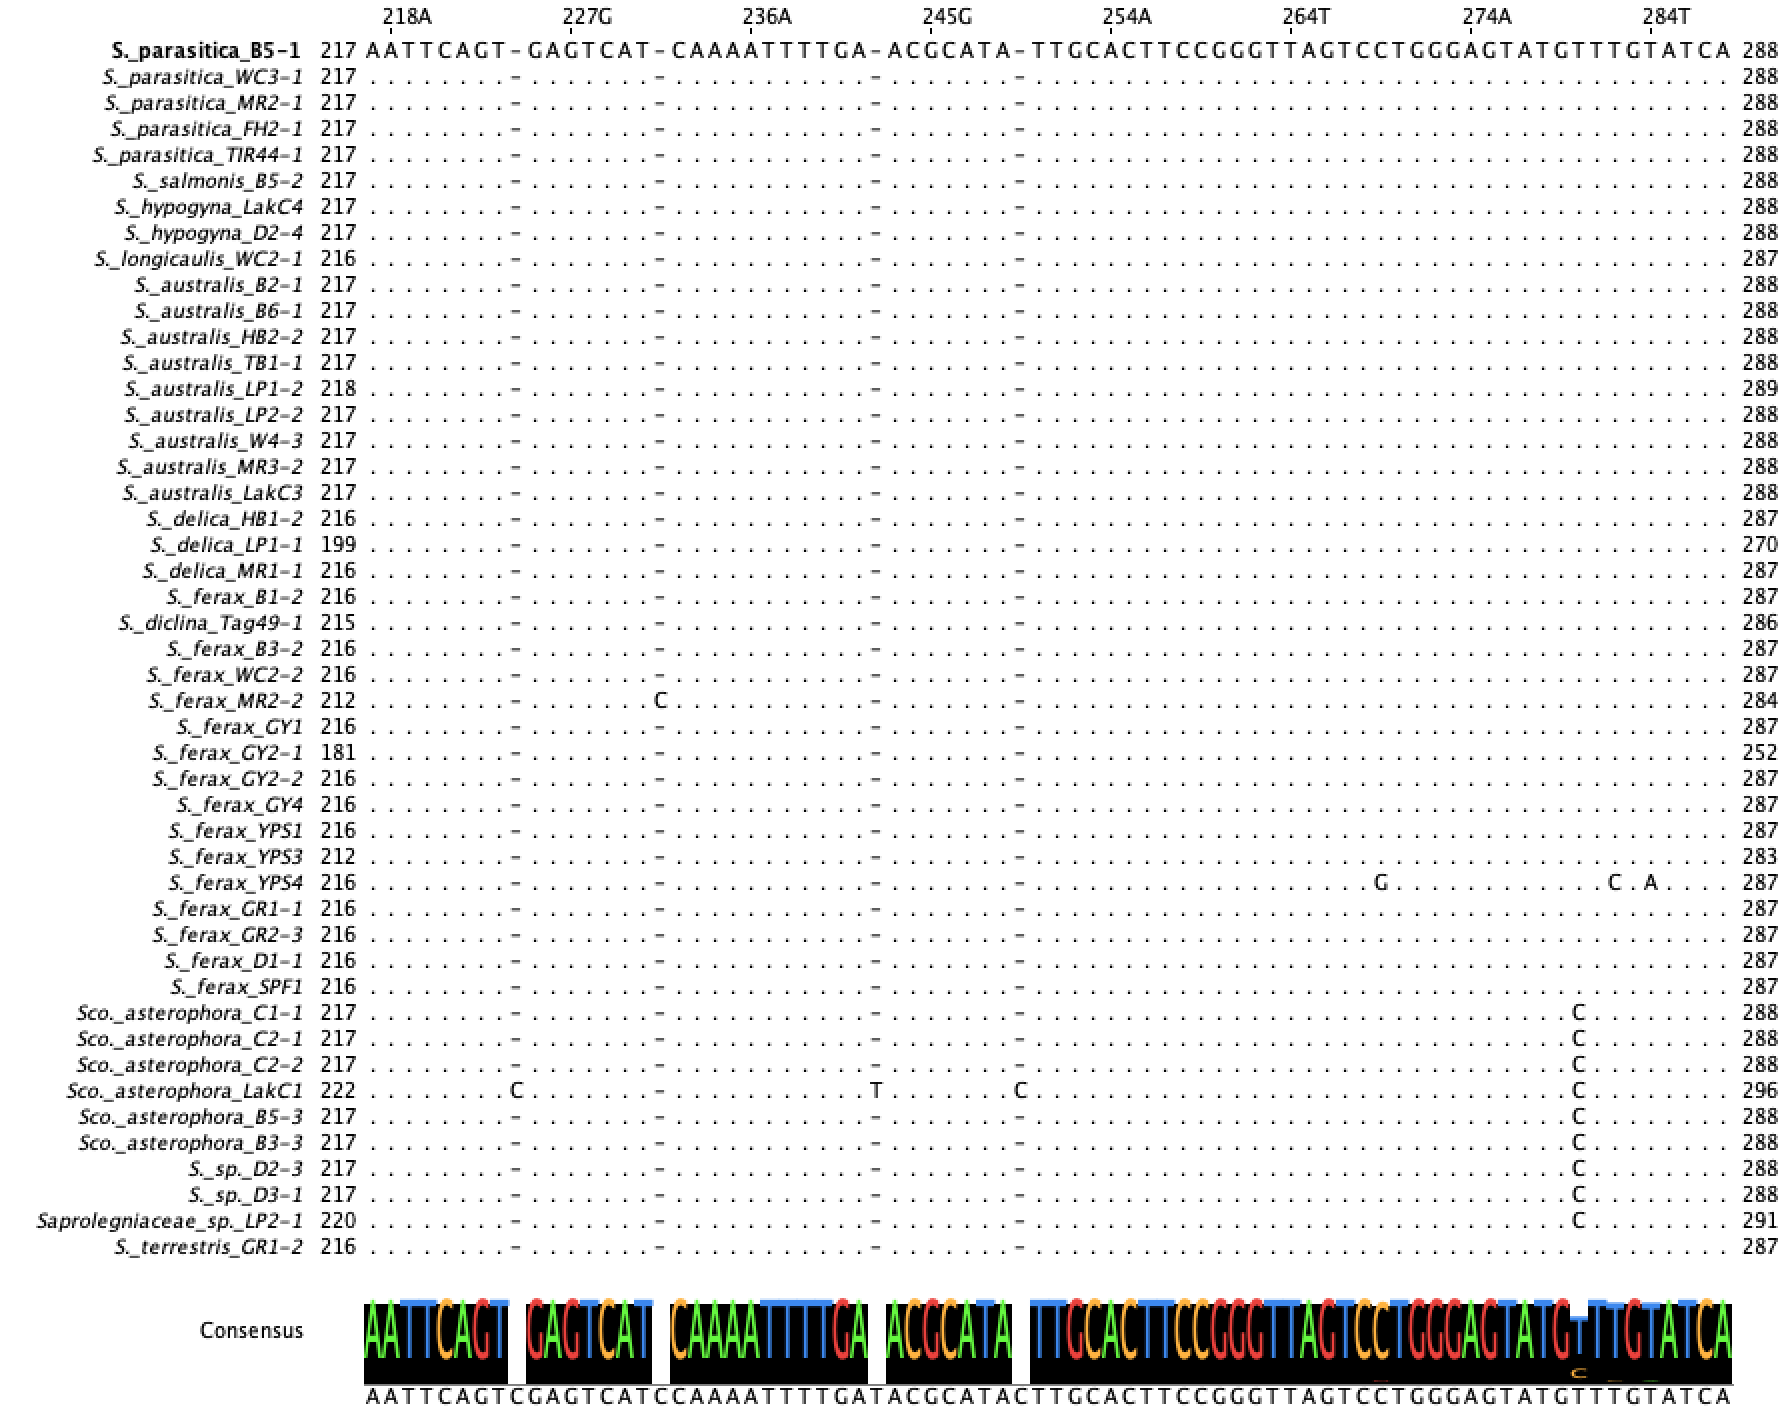


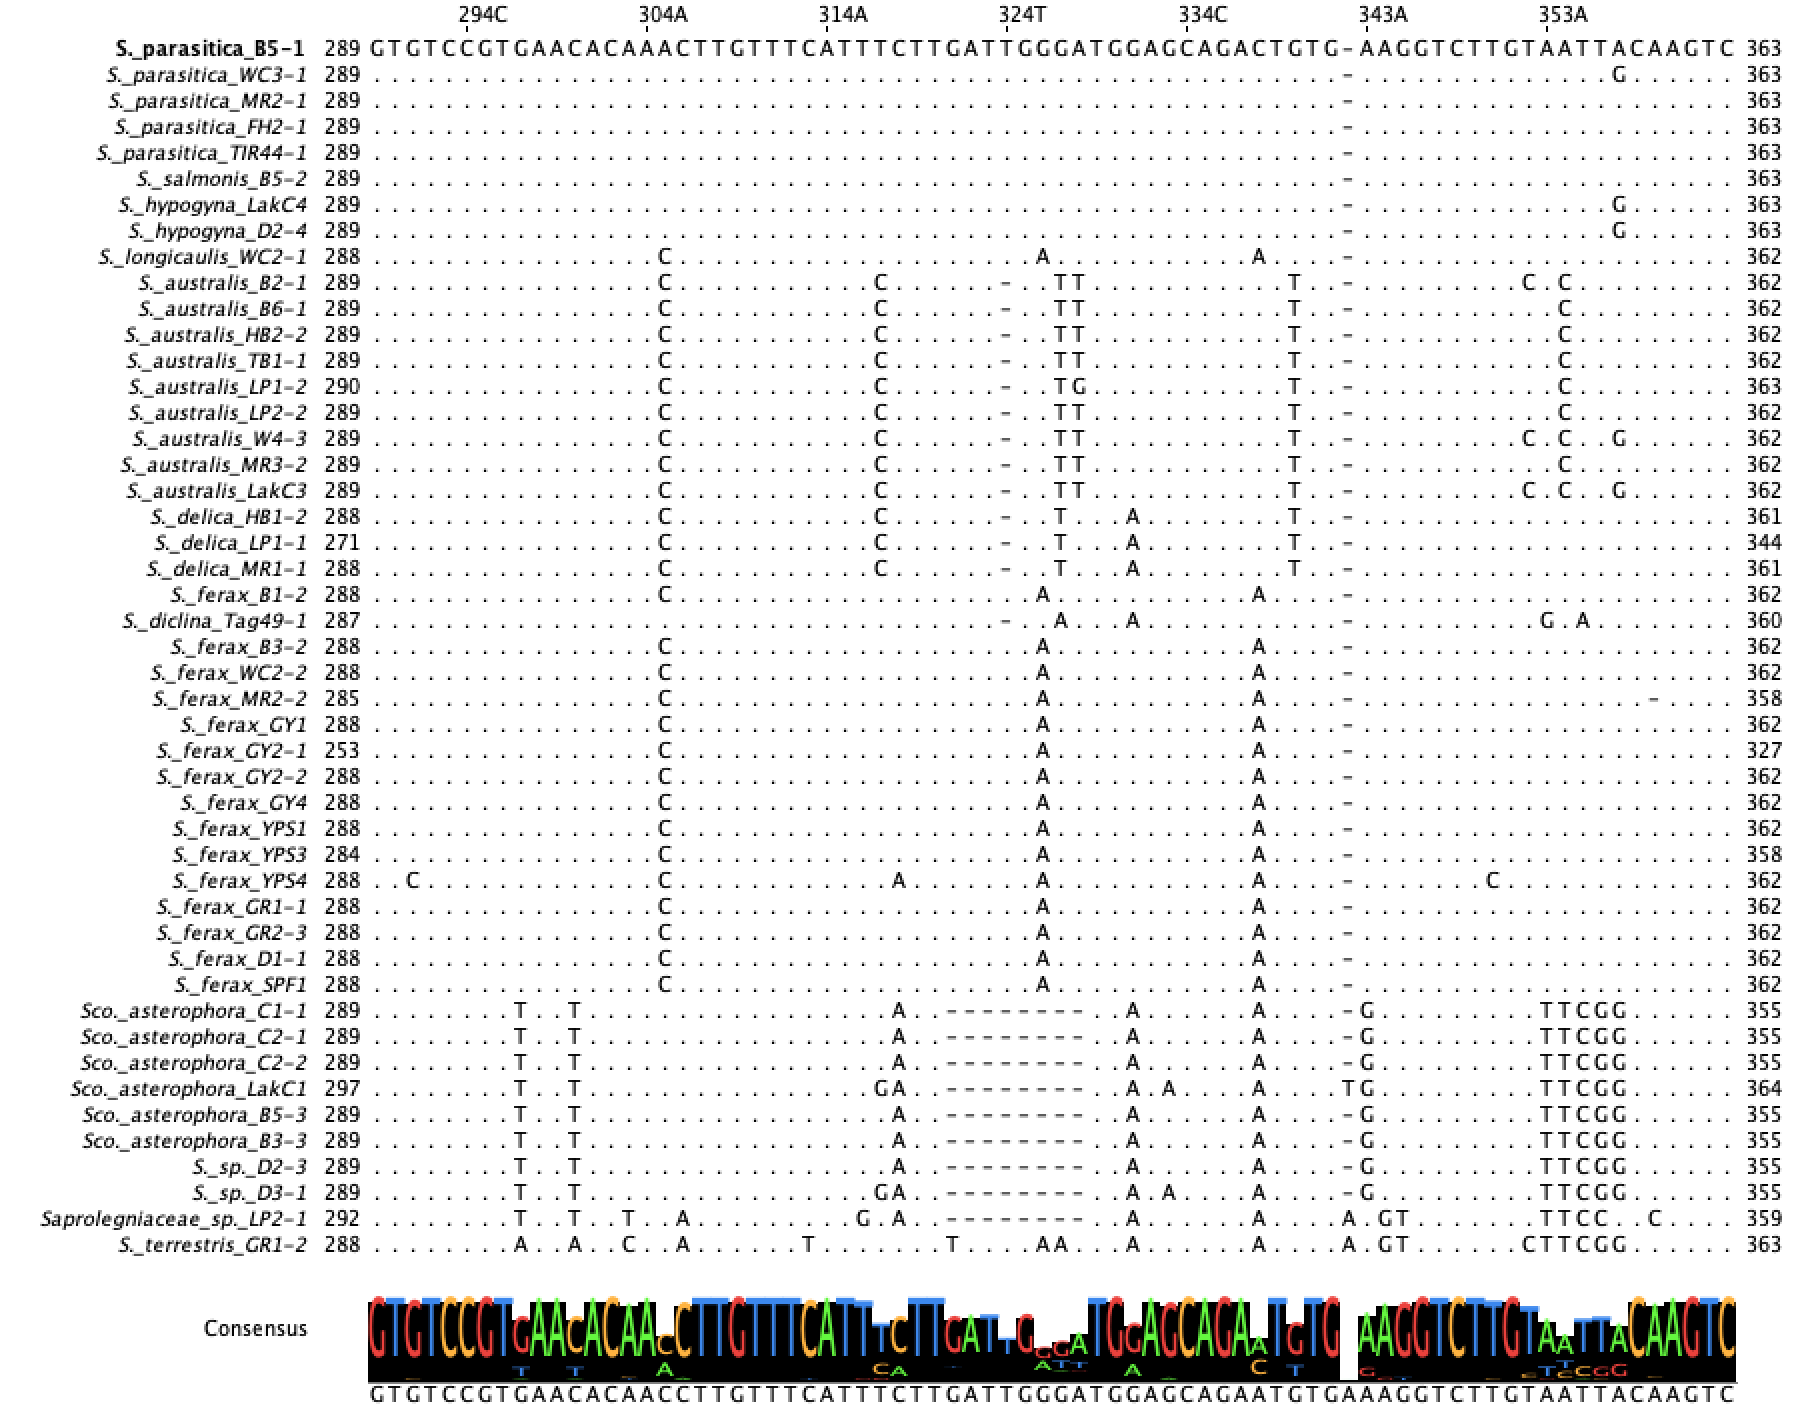


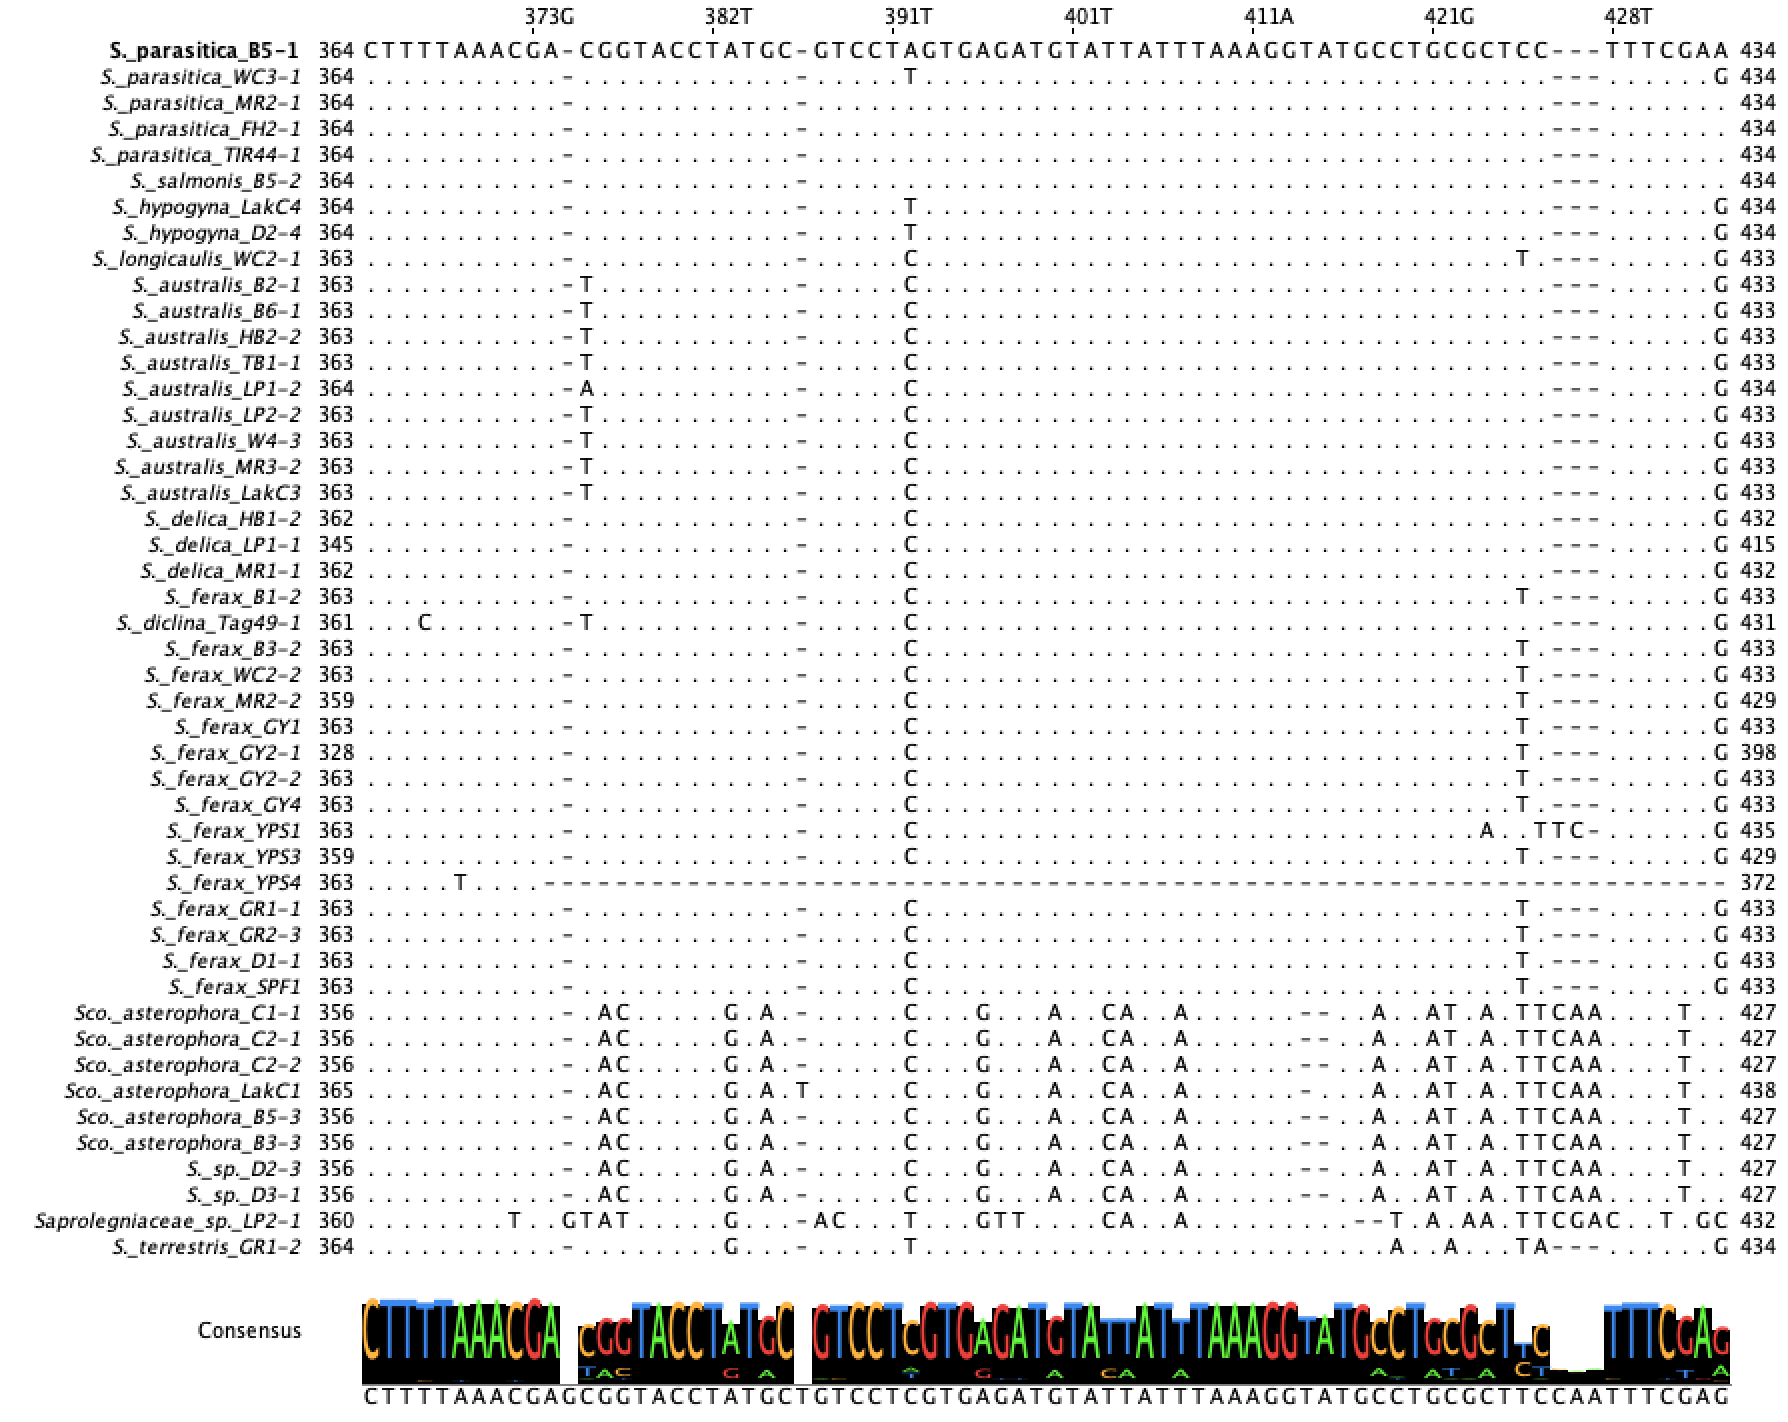


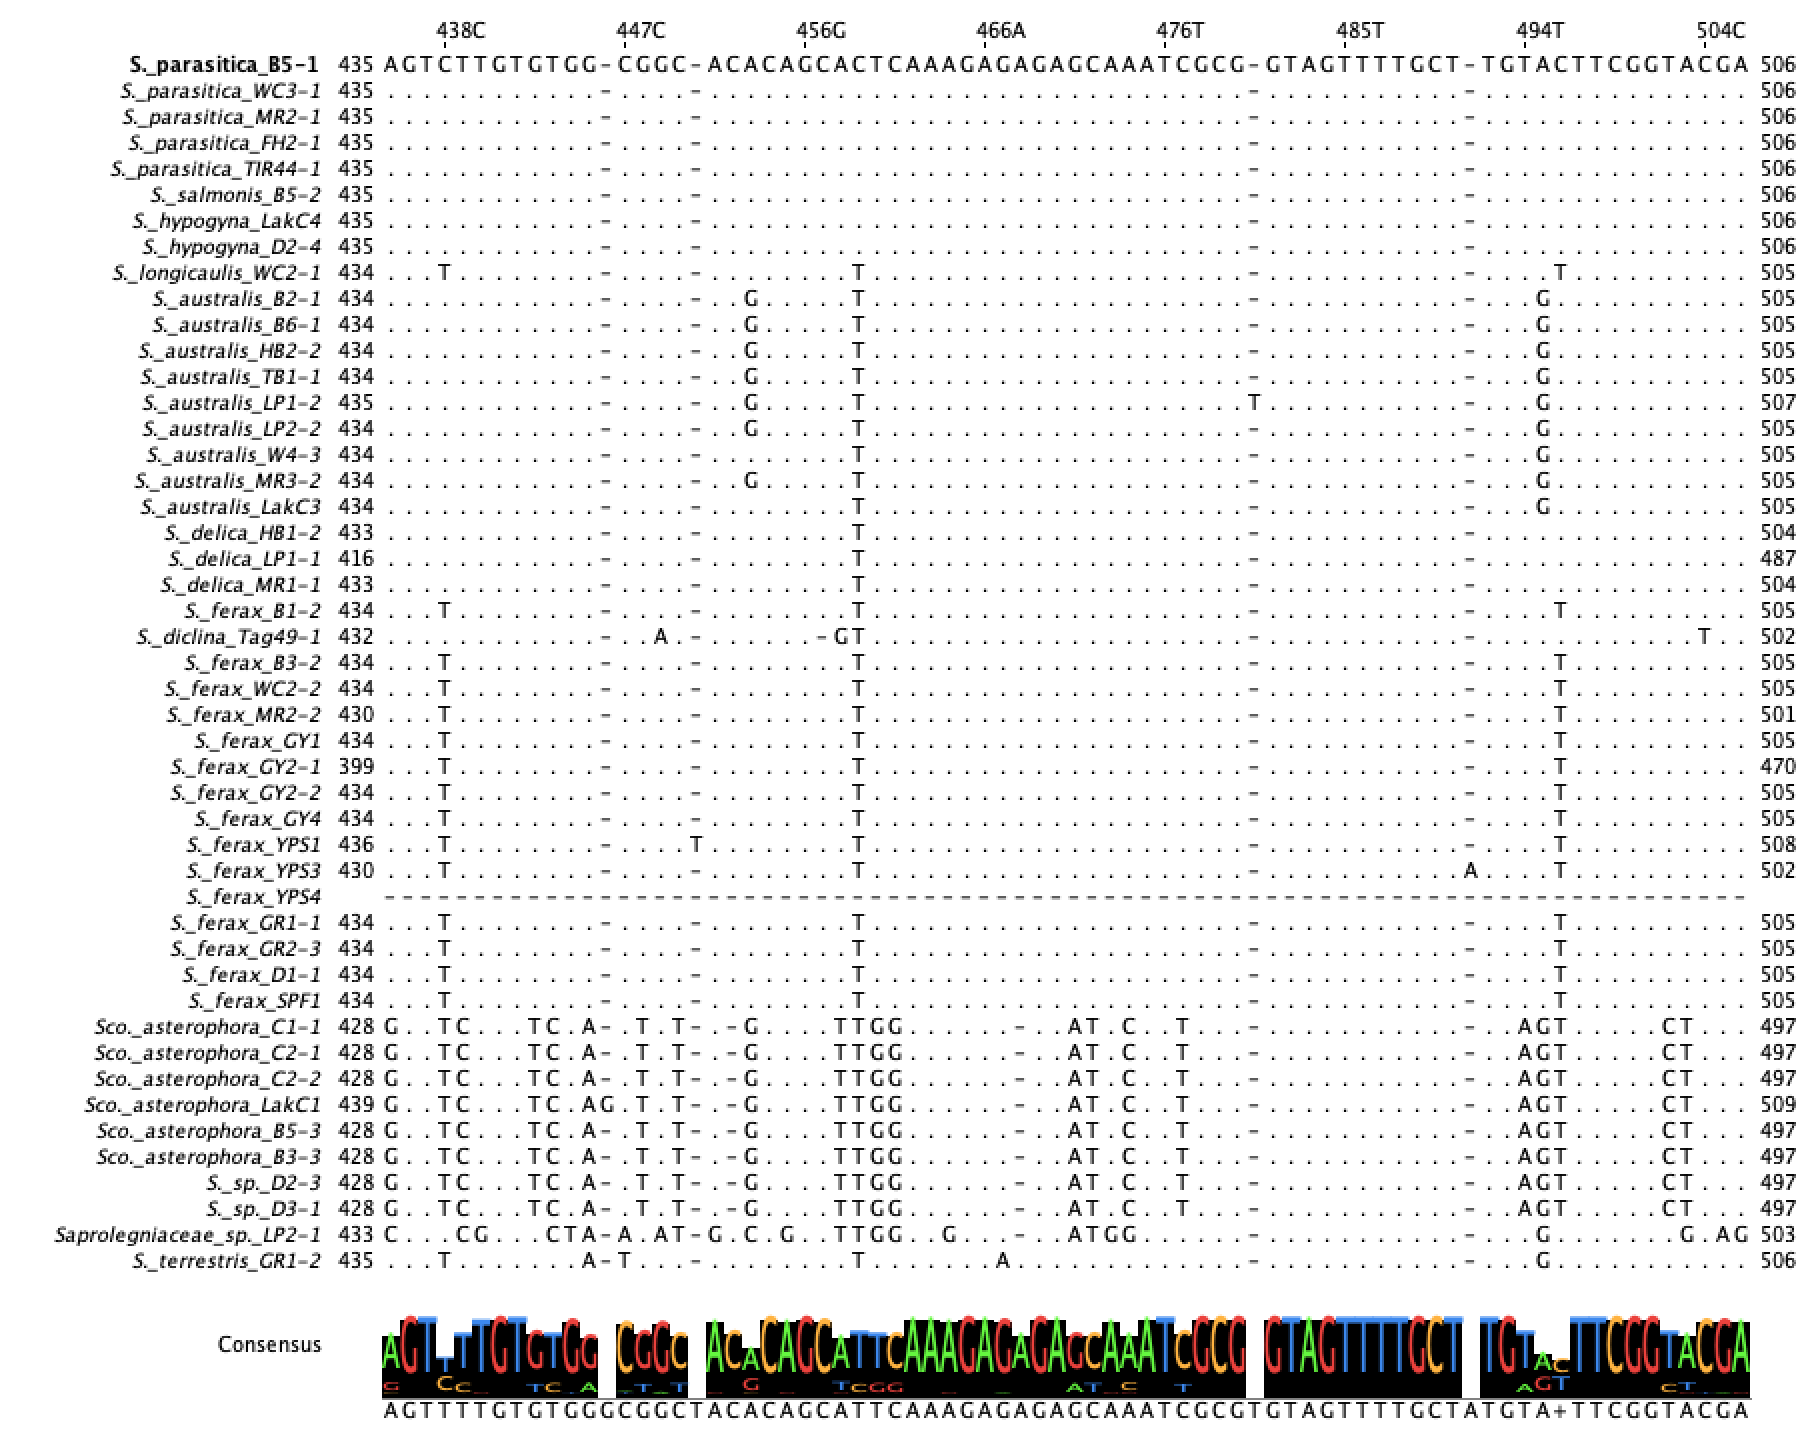


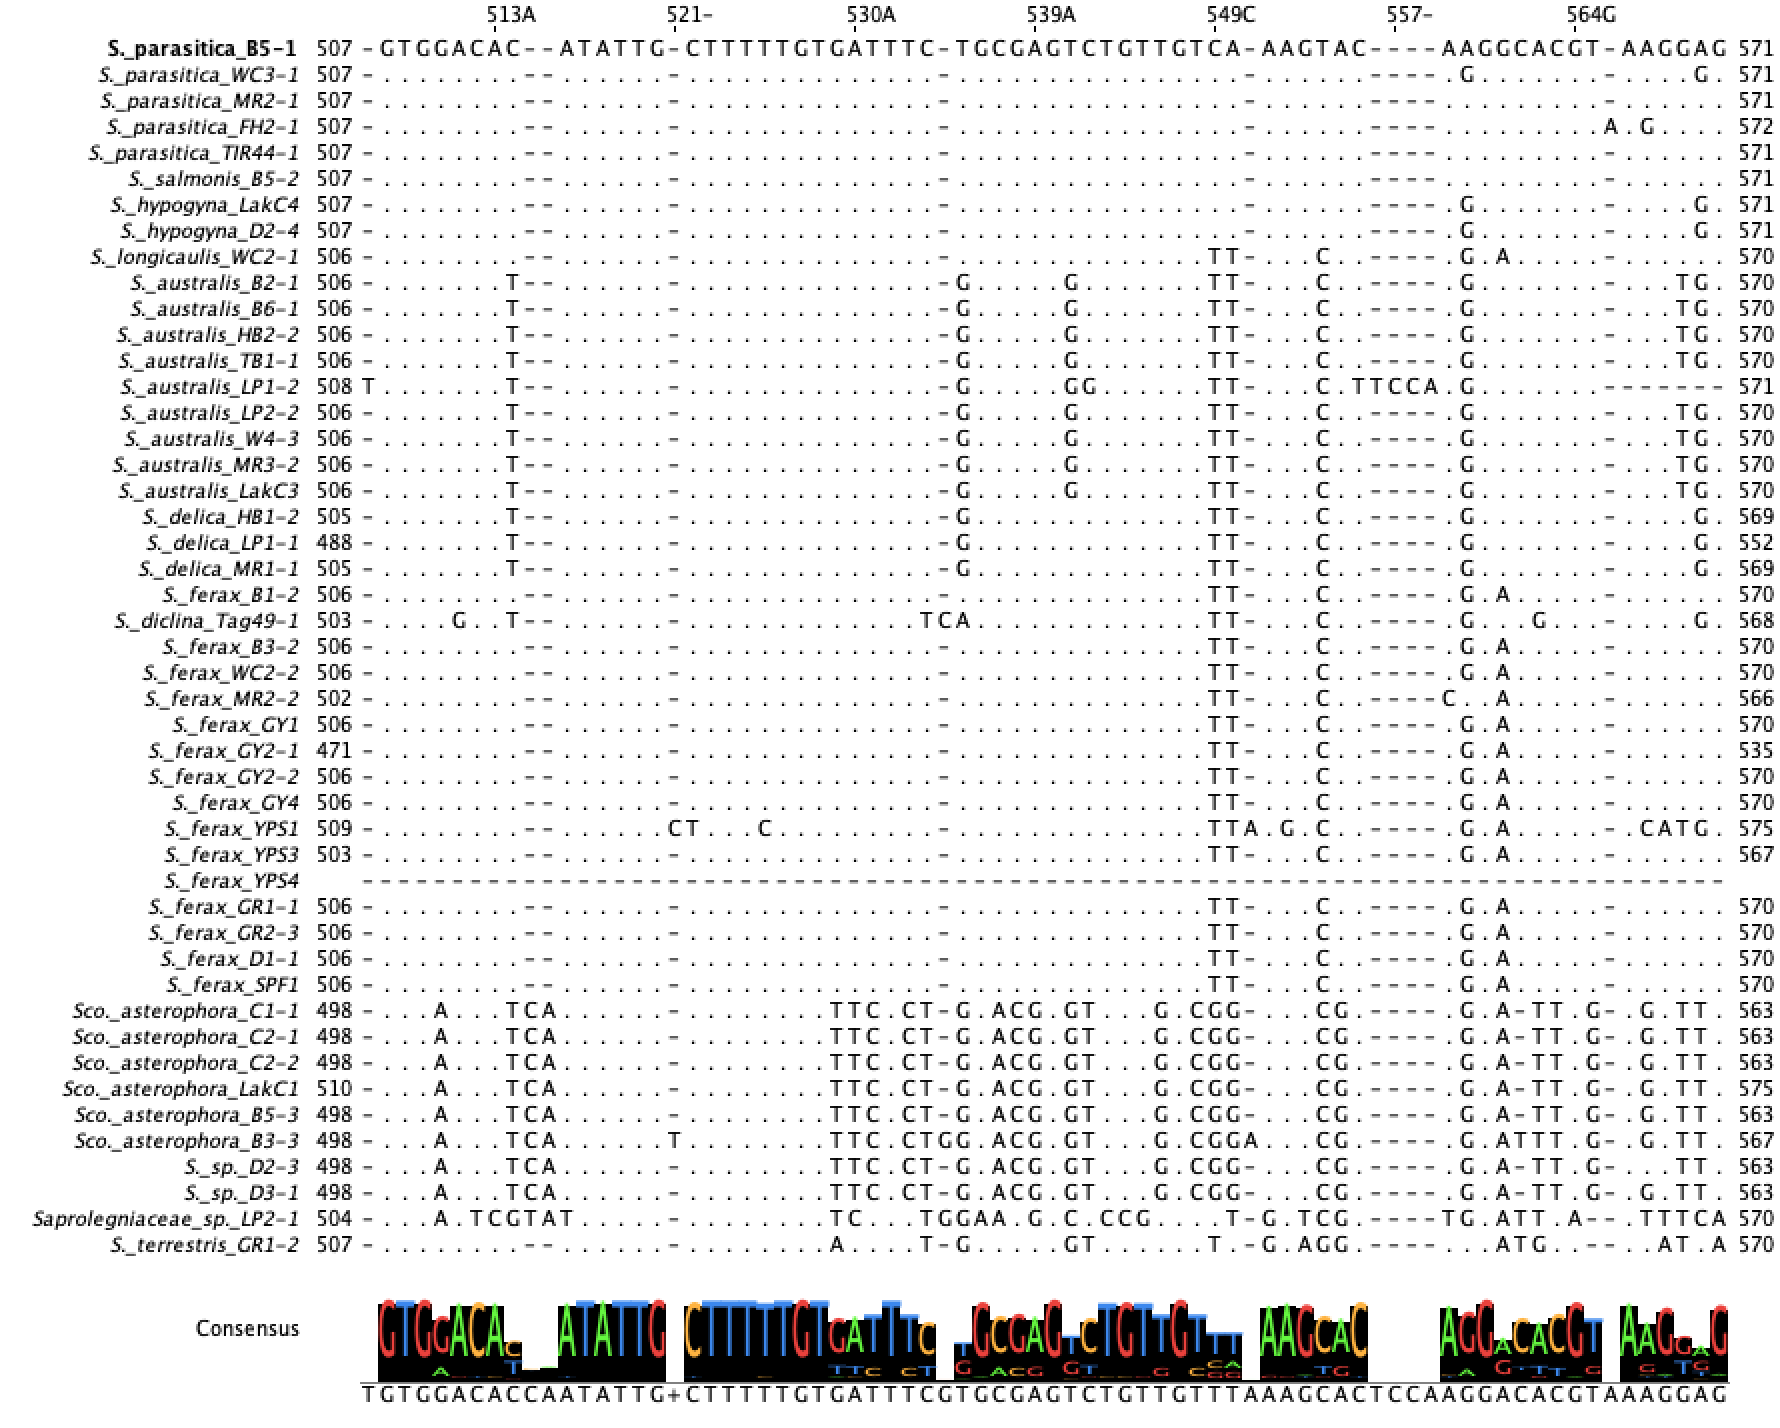


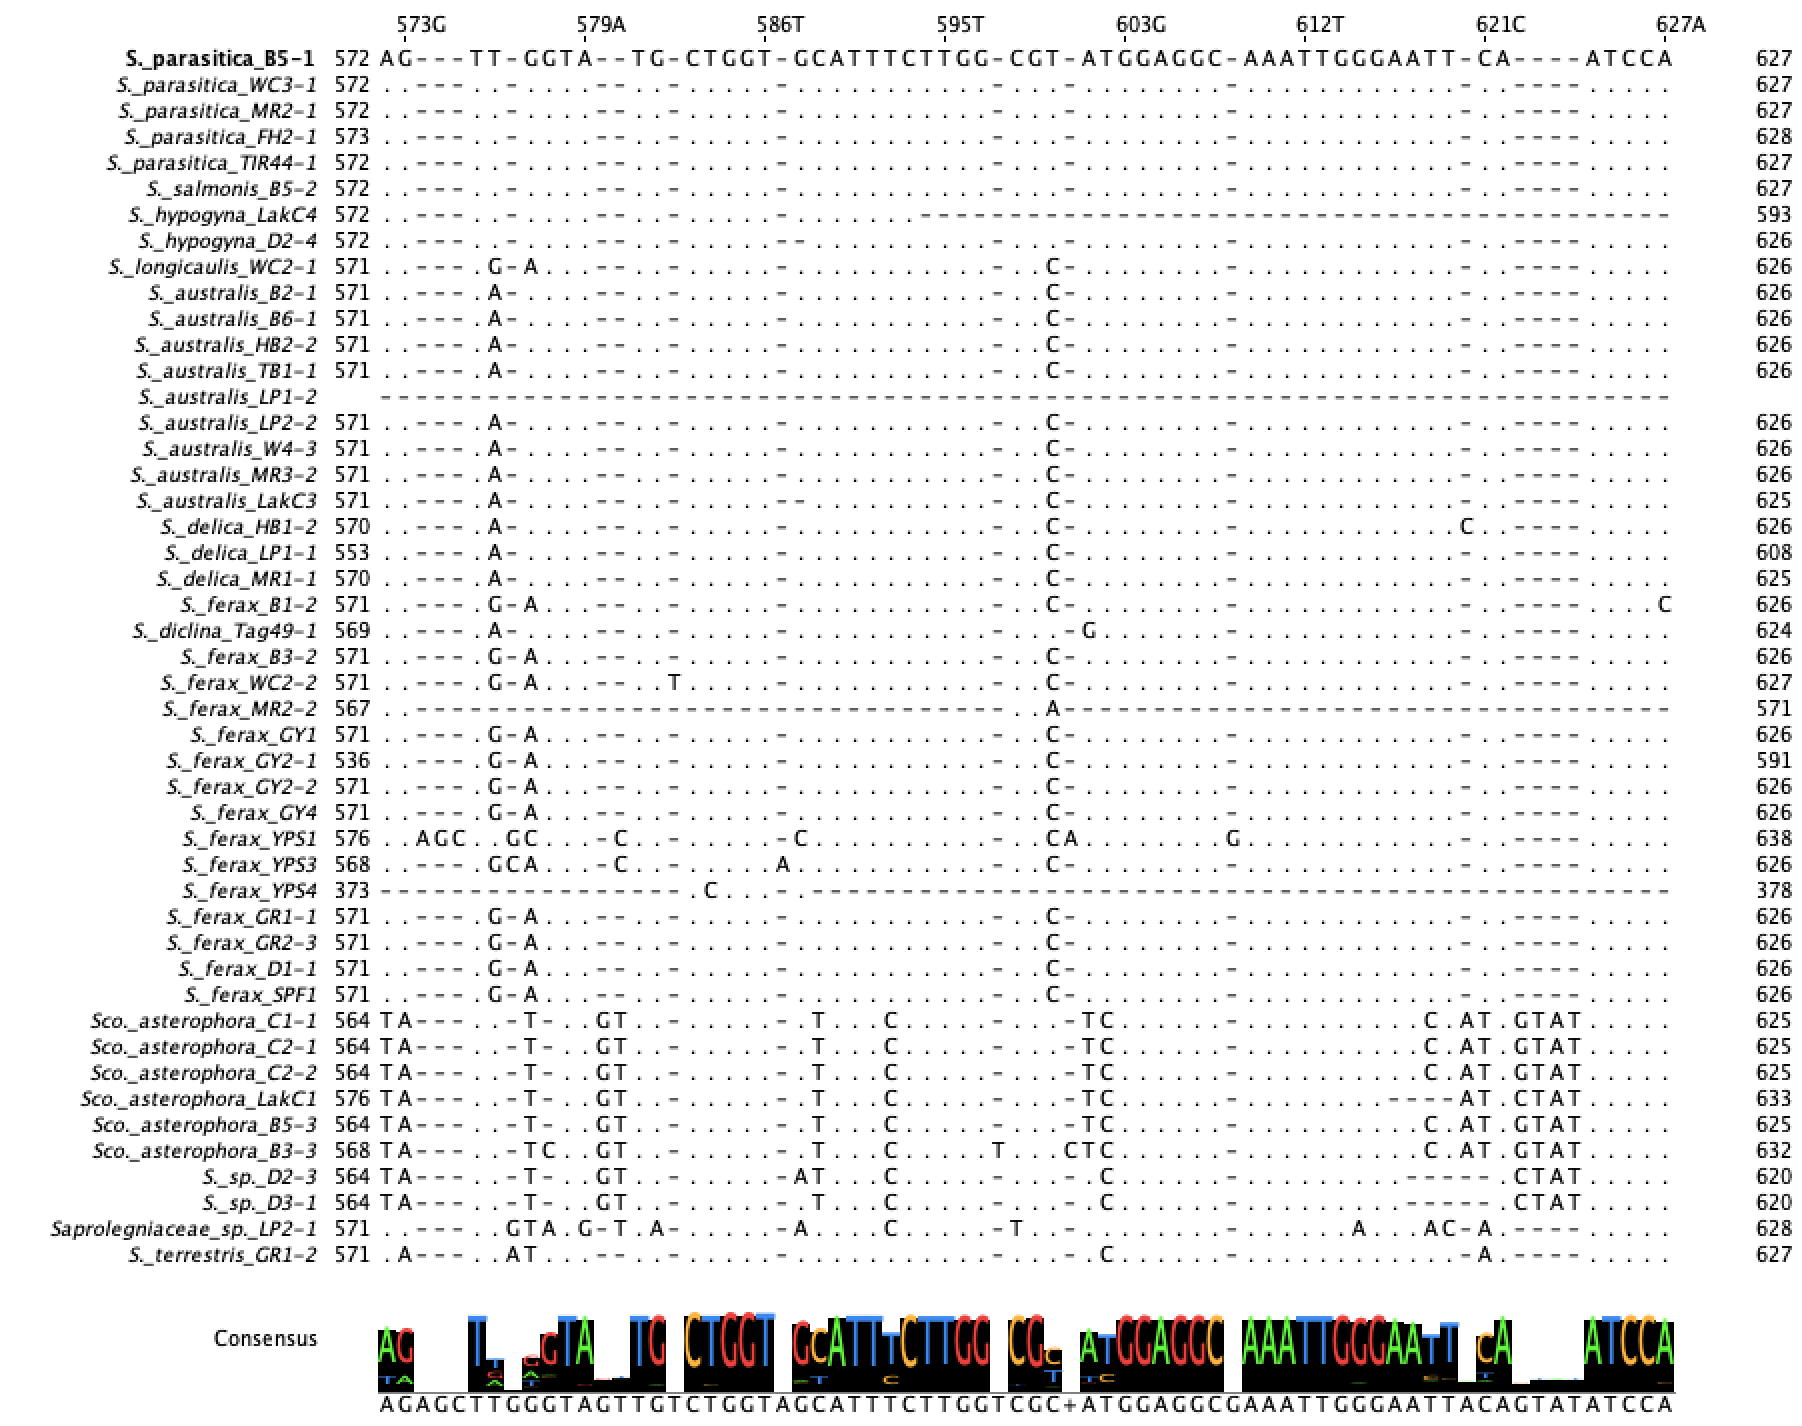


Fig. S2 Multiple sequence alignment of the ITS sequences from 47 Saprolegnia isolates. The alignment includes sequences from *Saprolegnia* and *Scolegnia* spanning the ITS1, 5.8S rRNA, and ITS2 sub-regions. Sequences were aligned using the MUSCLE alignment within Jalview. Dots (.) indicate nucleotides identical to the top reference sequence, and dashes (-) represent alignment gaps introduced to accommodate insertions or deletions. Species and isolates identifiers are listed on the left.


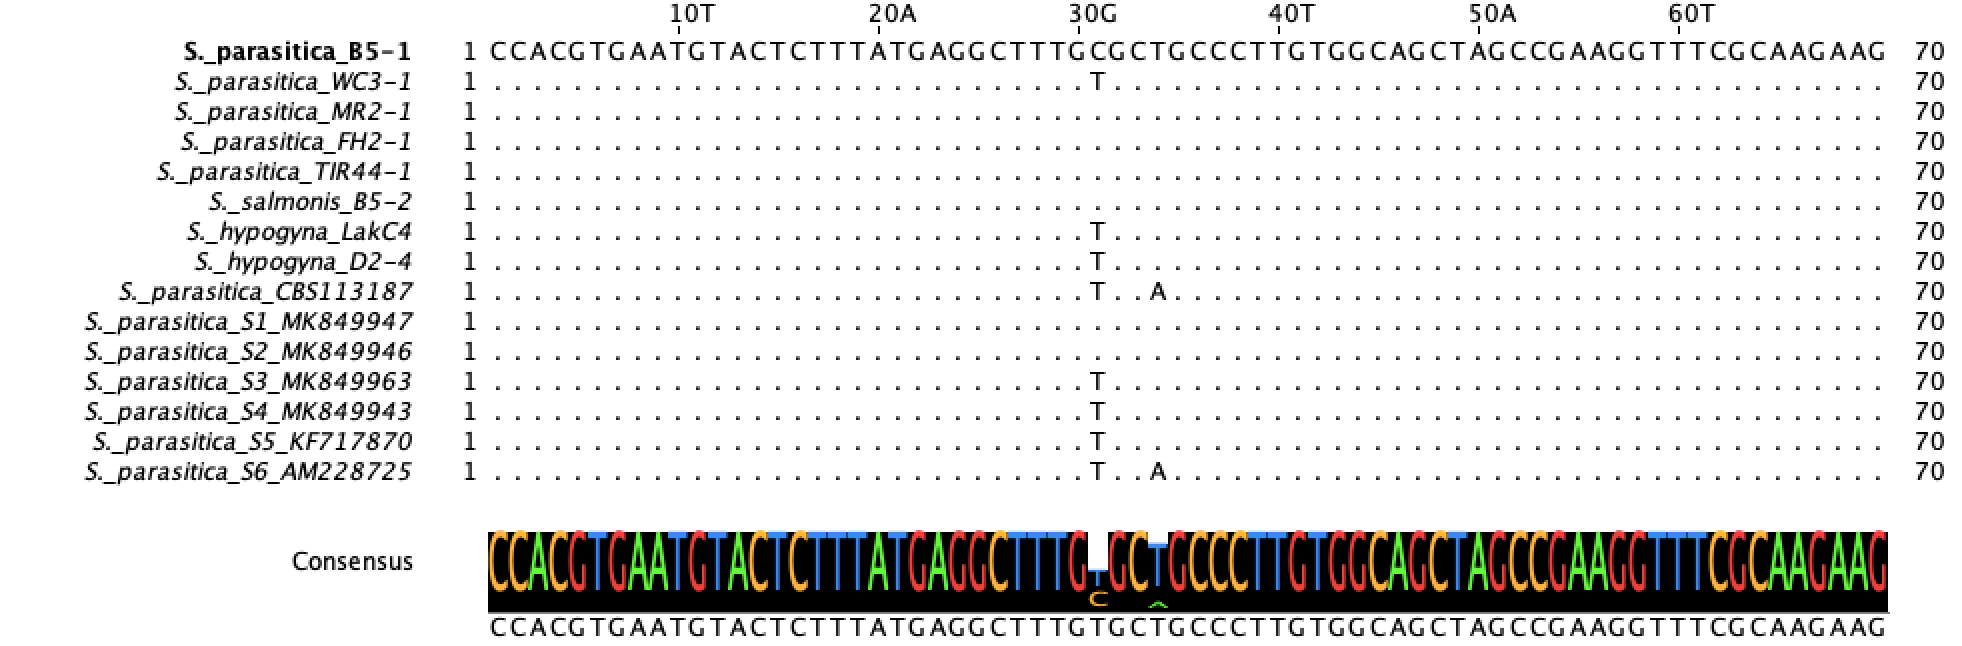


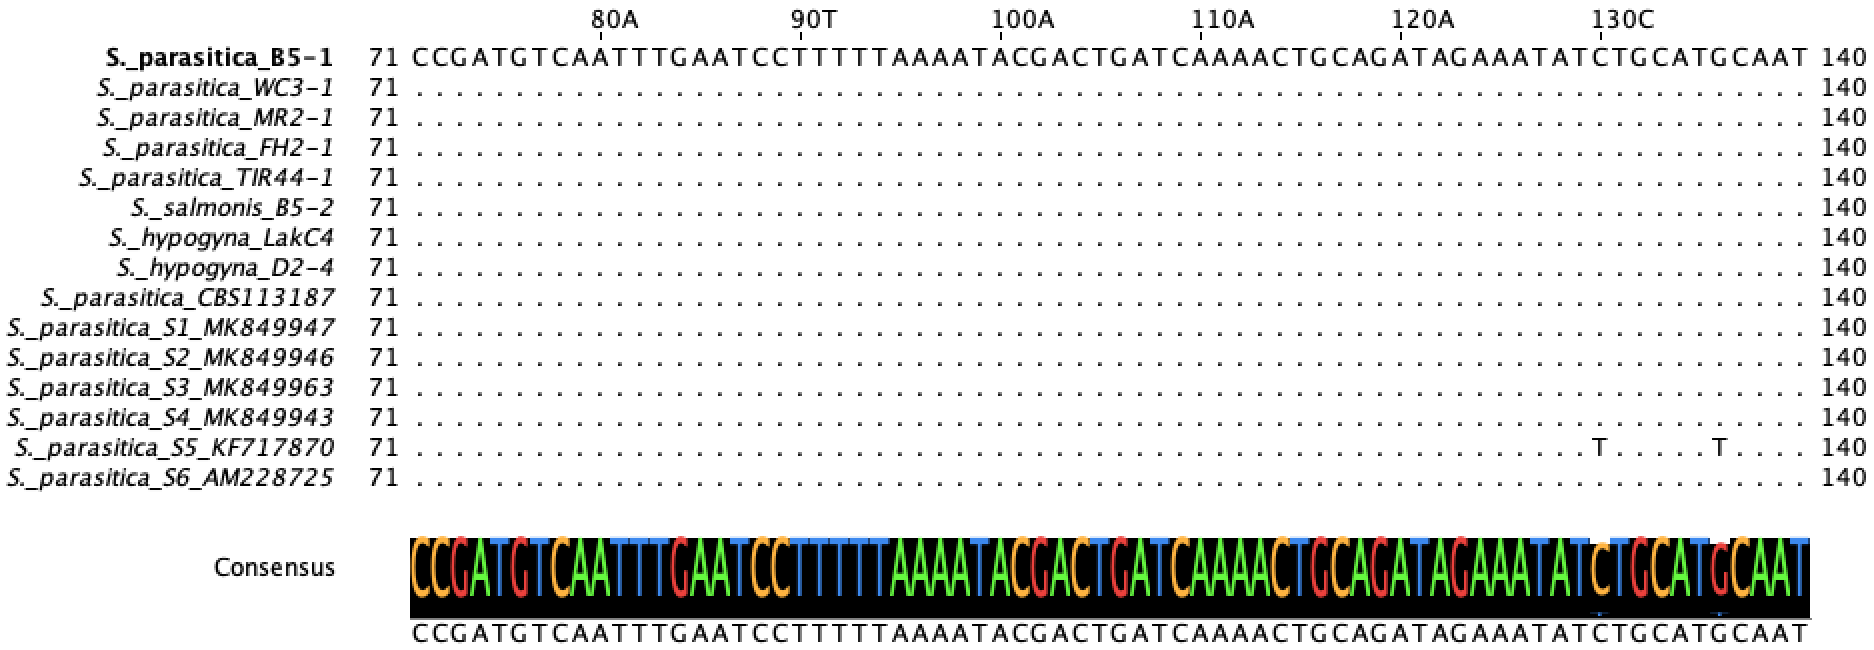


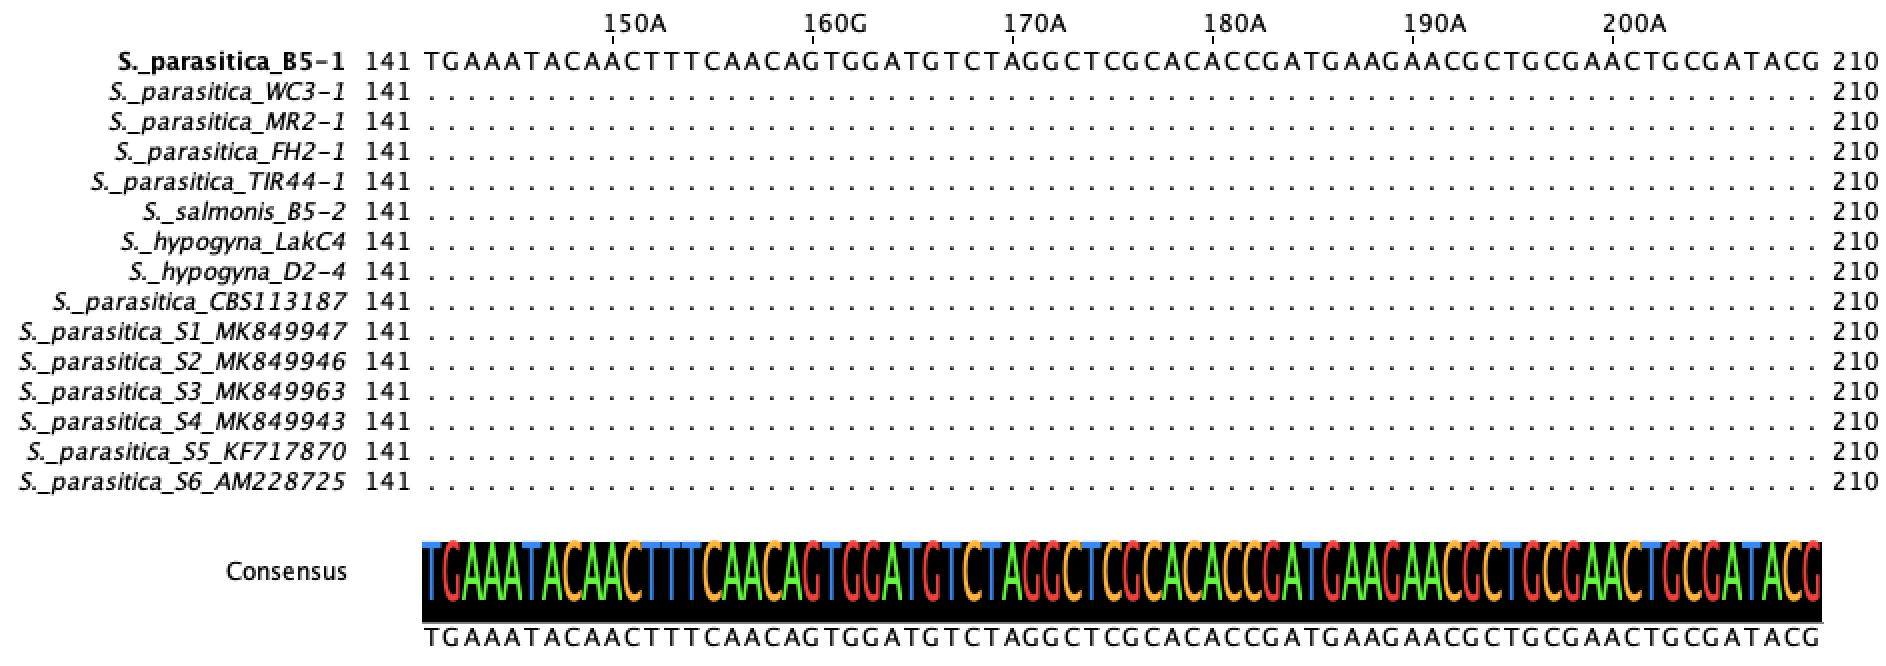


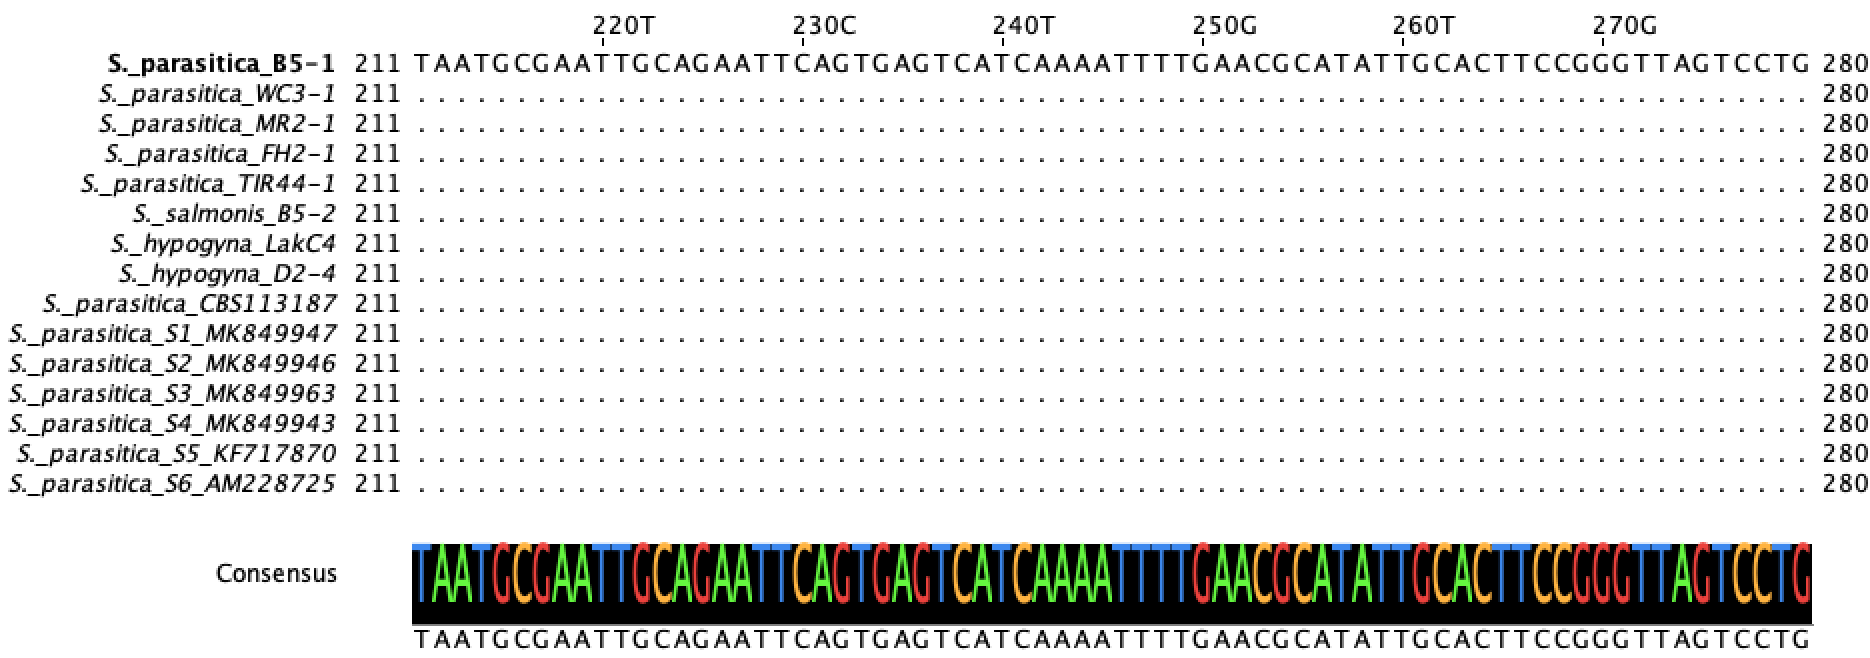


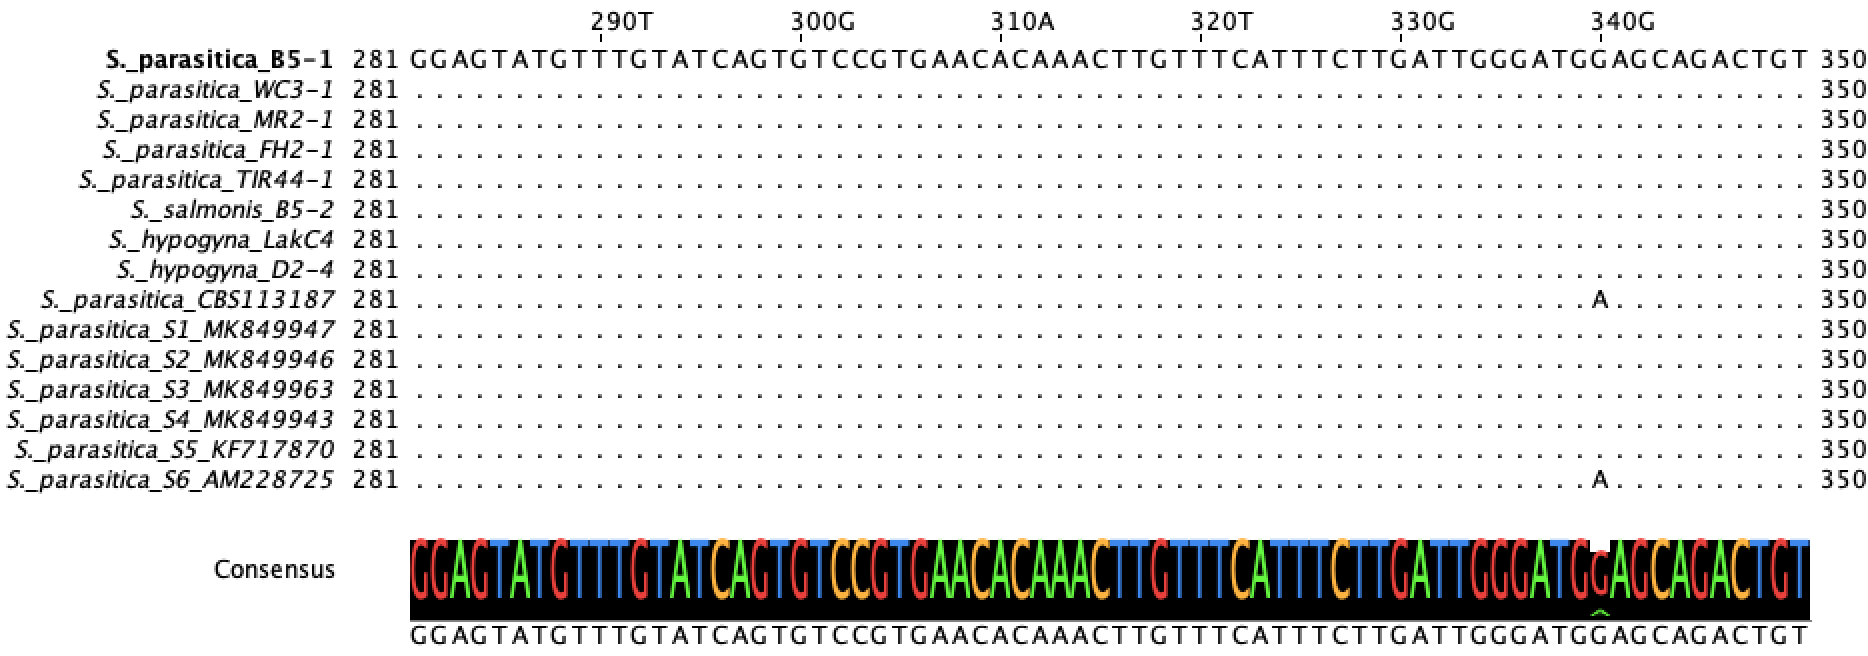


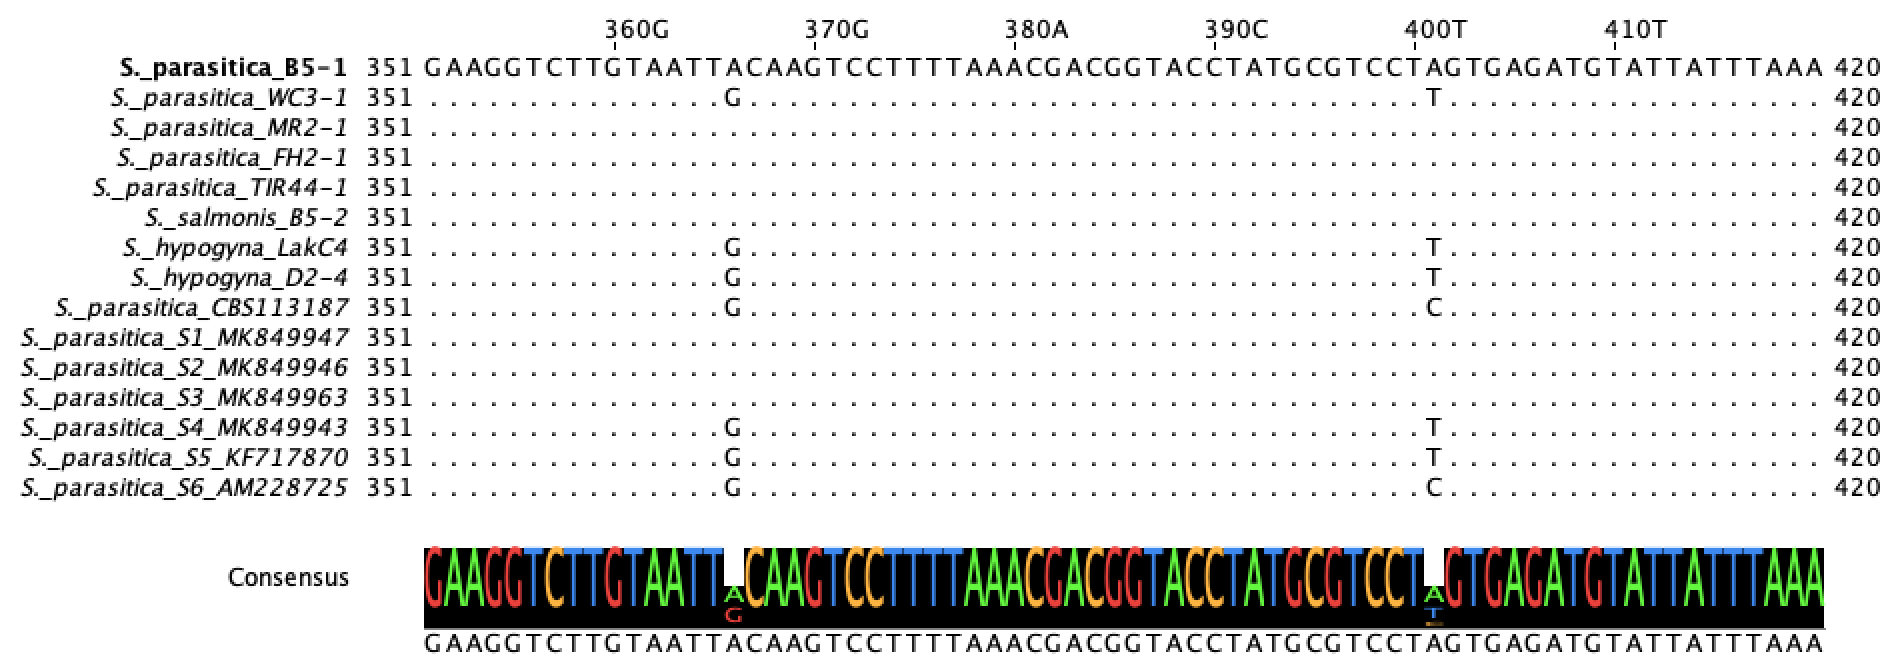


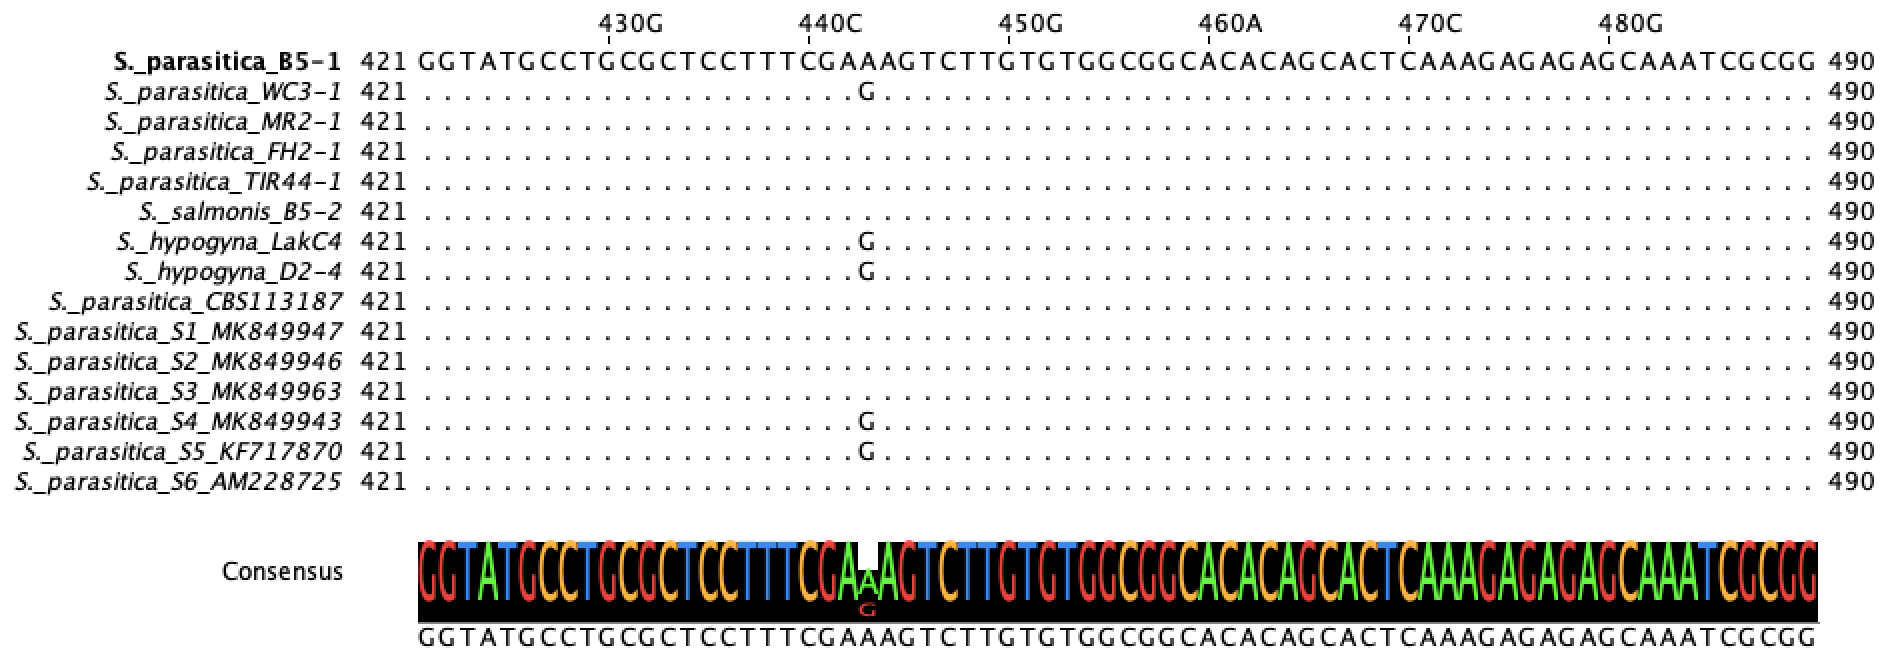


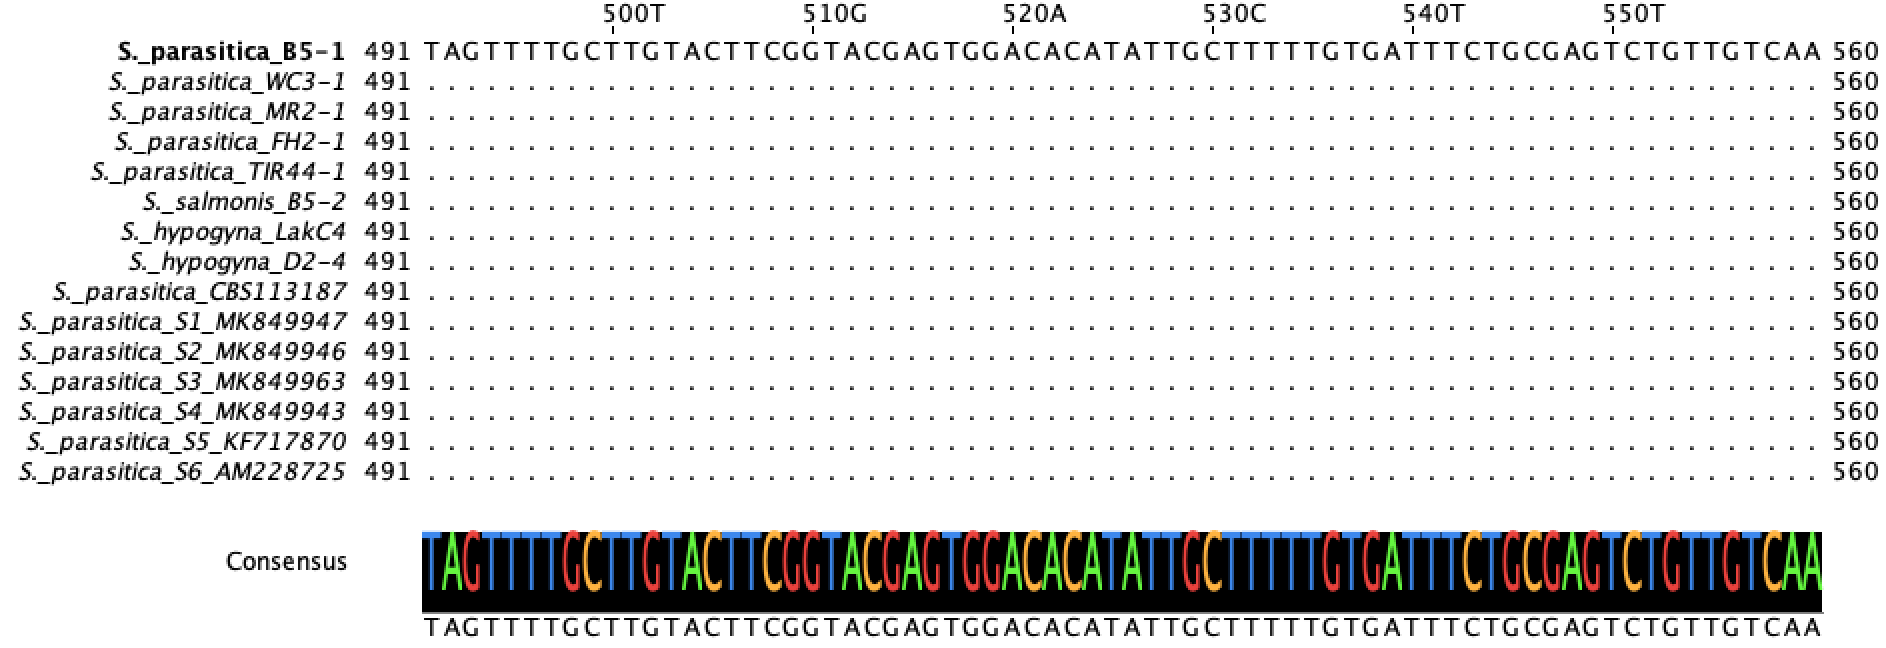


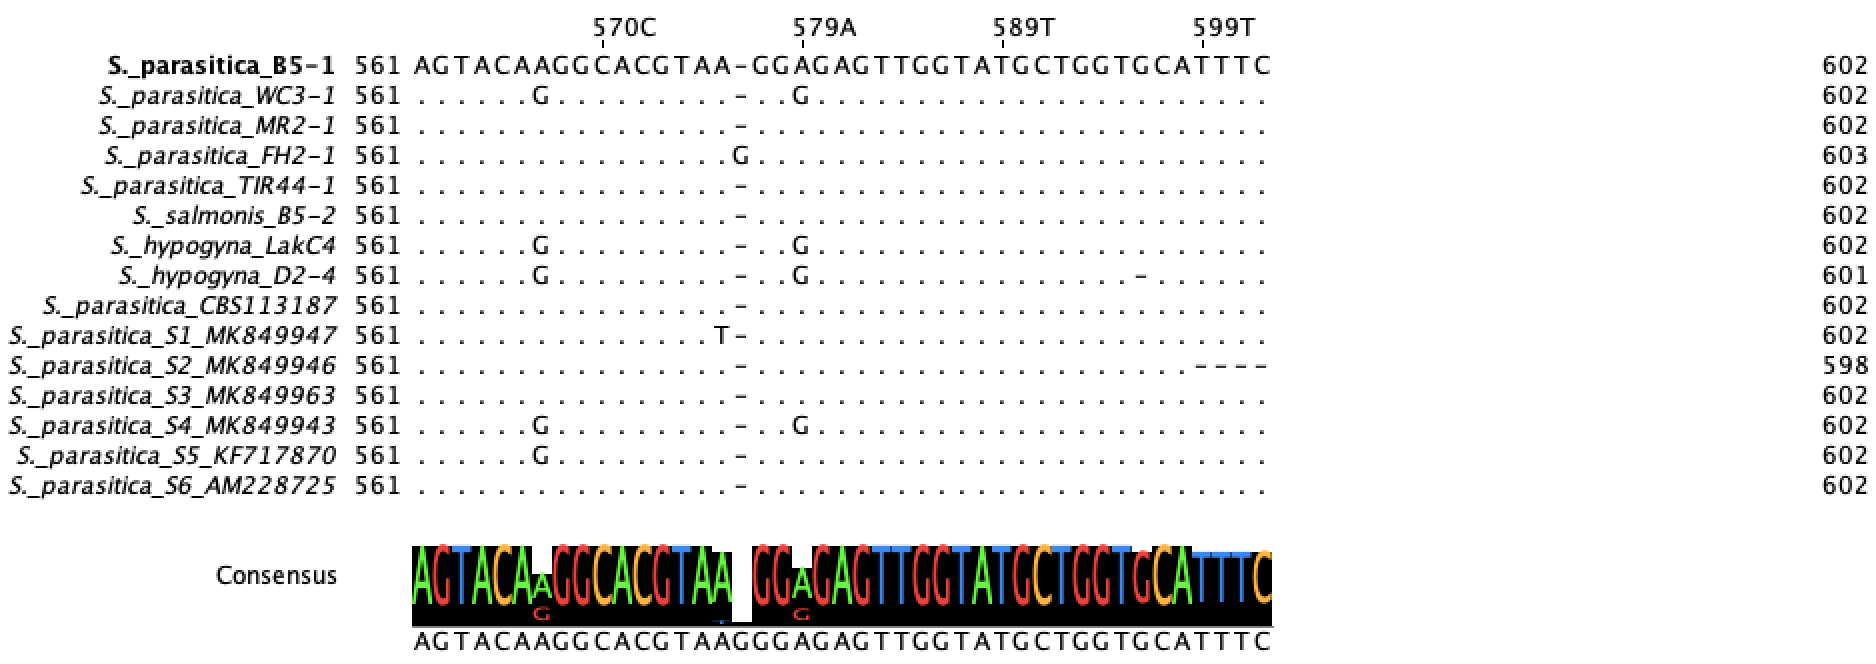


Fig. S3 Alignment of variable nucleotide sites among *Saprolegnia parasitica* isolates and reference phylotypes. The isolates from this study were compared with S2 and S4 reference phylotypes at 16 variable nucleotide positions (128, 146, 346, 372, 375, 393, 471, 499, 524, 560, 574, 575, 576, 577, 578, and 605 bp. Dots (.) indicate identity to the first sequence, and dashes (-) represent alignment gaps.


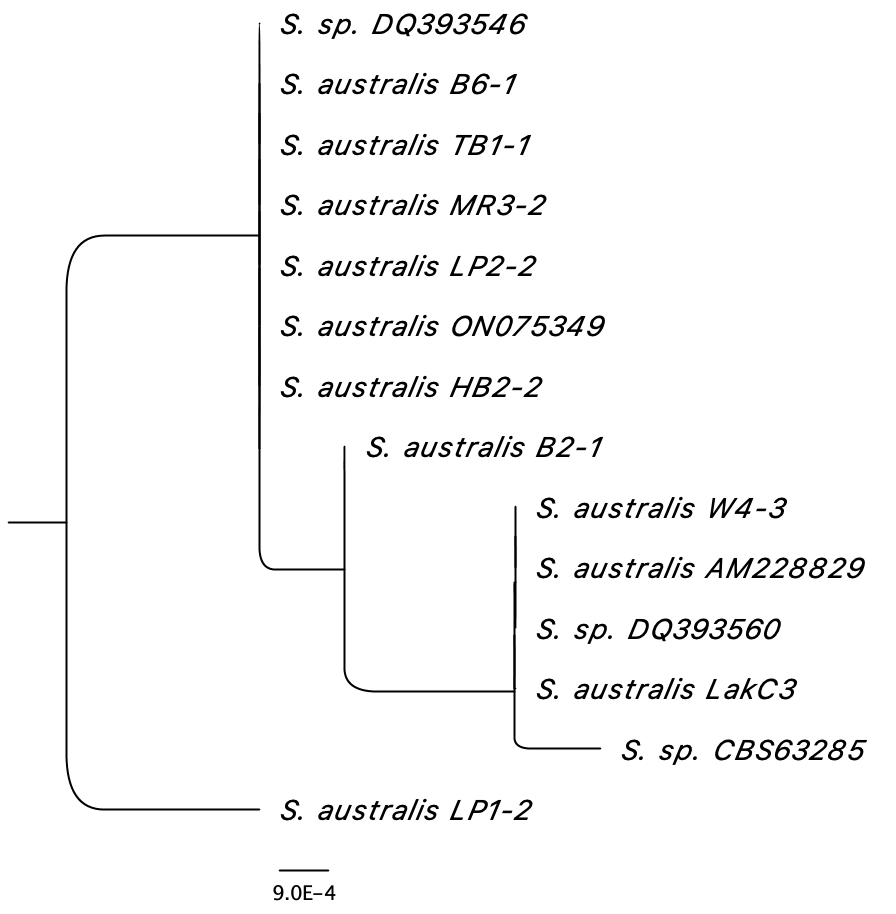


Fig. S4 Maximum-likelihood phylogeny of *Saprolegnia* *australis* ITS sequences. Nine isolated from this study (B6-1, TB1-1, MR3-2, LP2-2, HB2-2, B2-1, W4-3, LakC3, and LP1-2) were analyzed with five reference sequences (DQ393546, ON075349, AM228829, DQ393560, and CBS63285) to assess intraspecific relationship with *S. australis*.


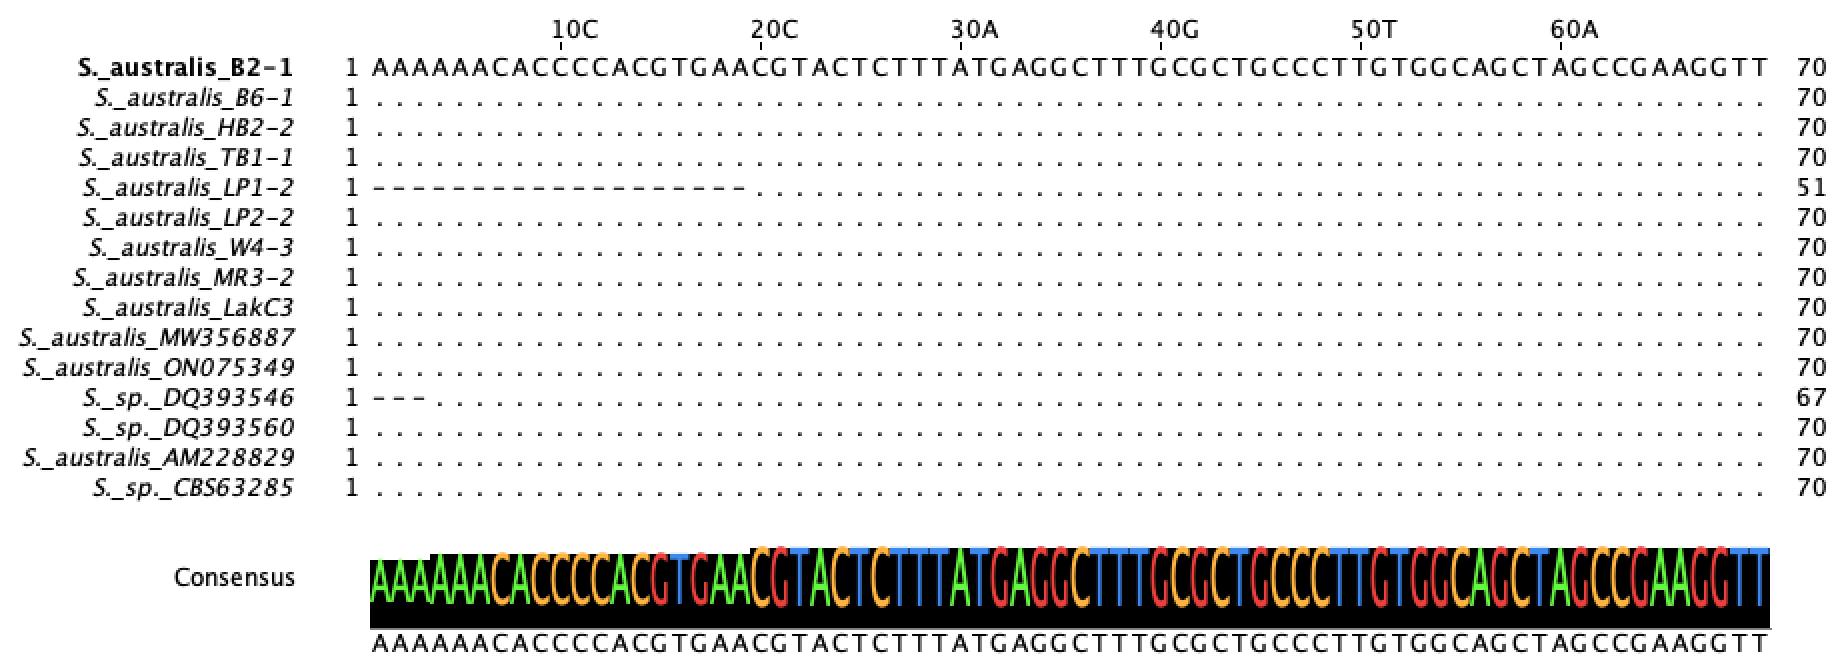


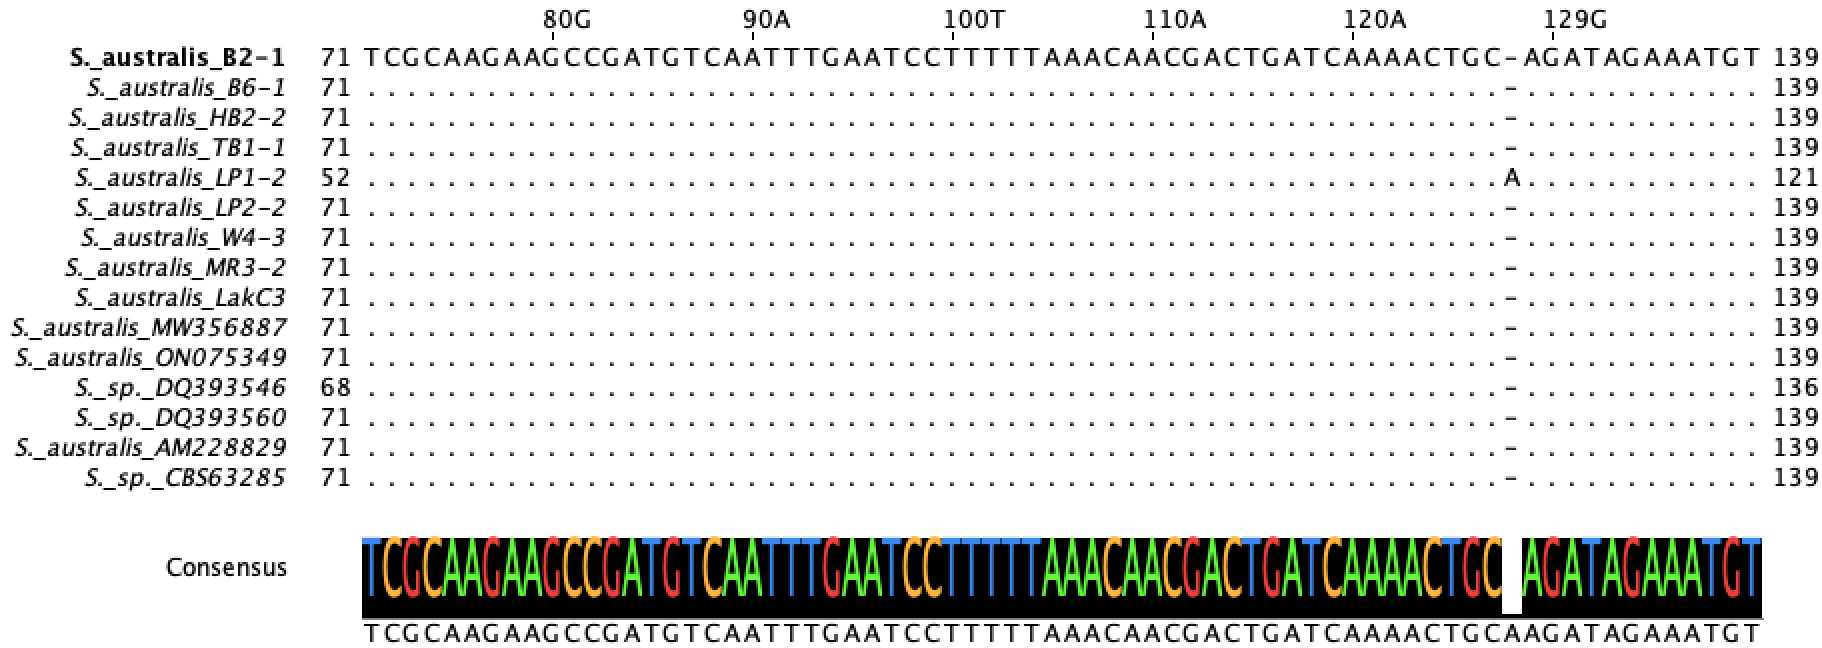


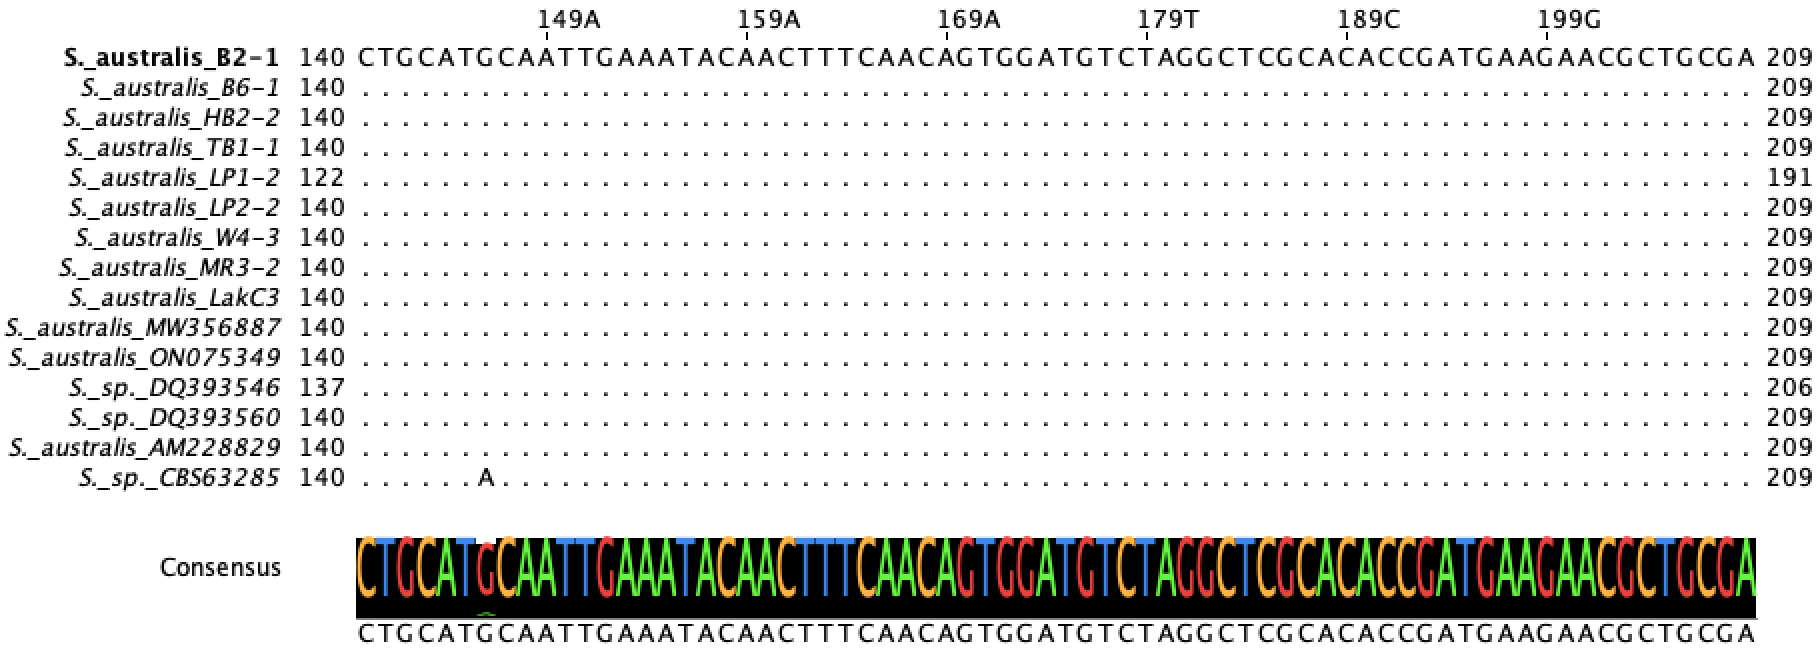


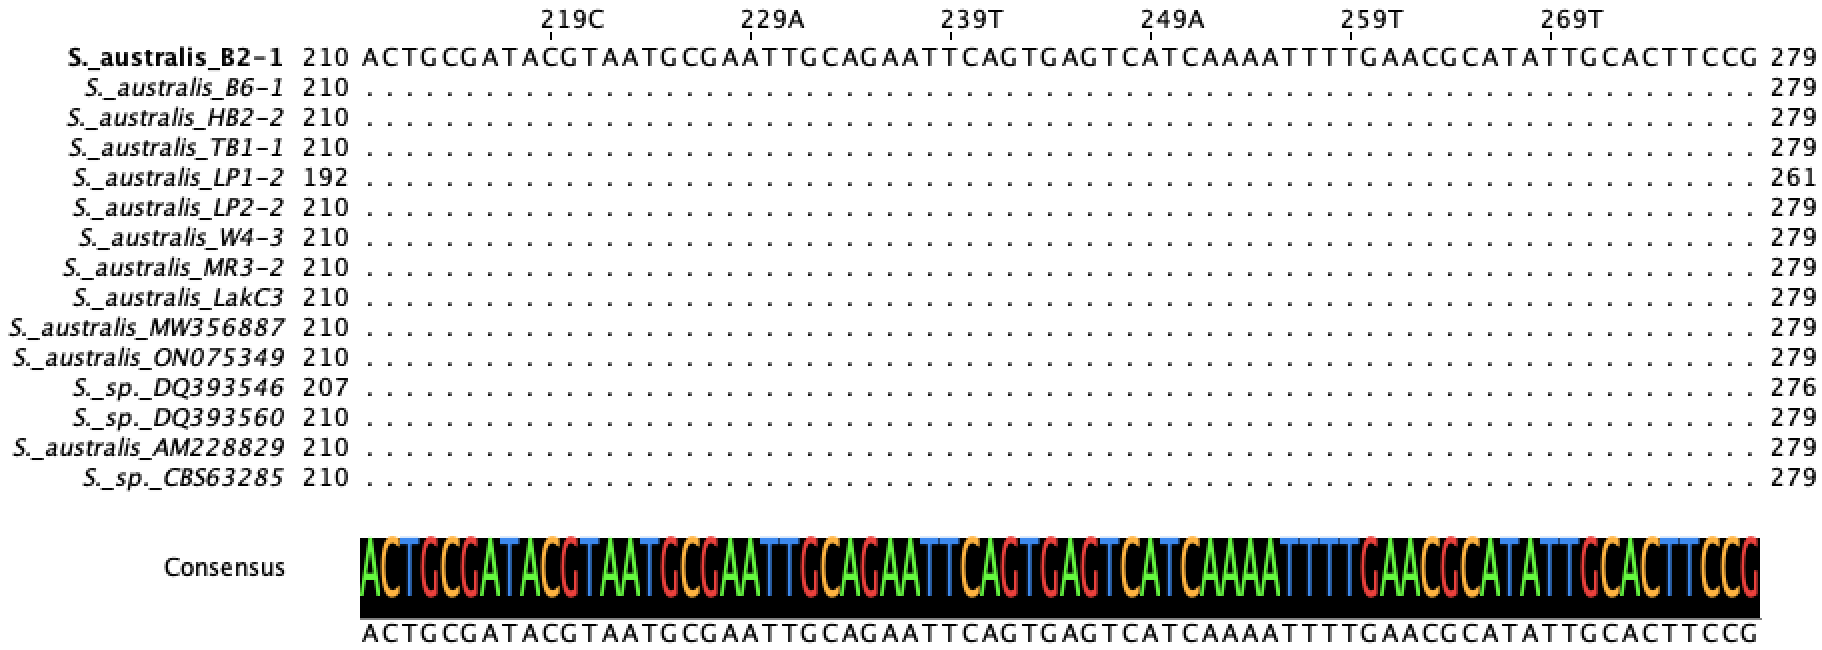


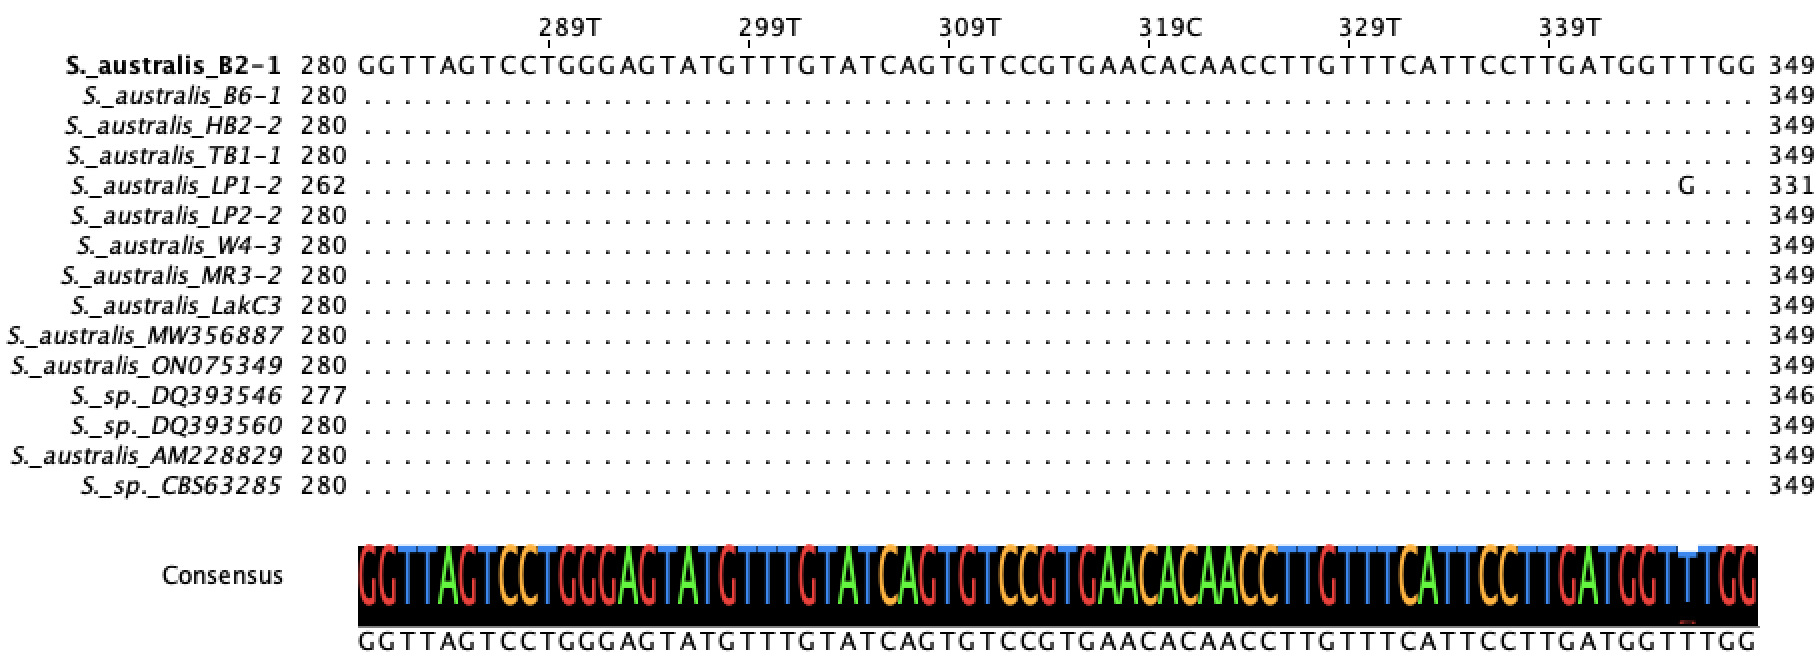


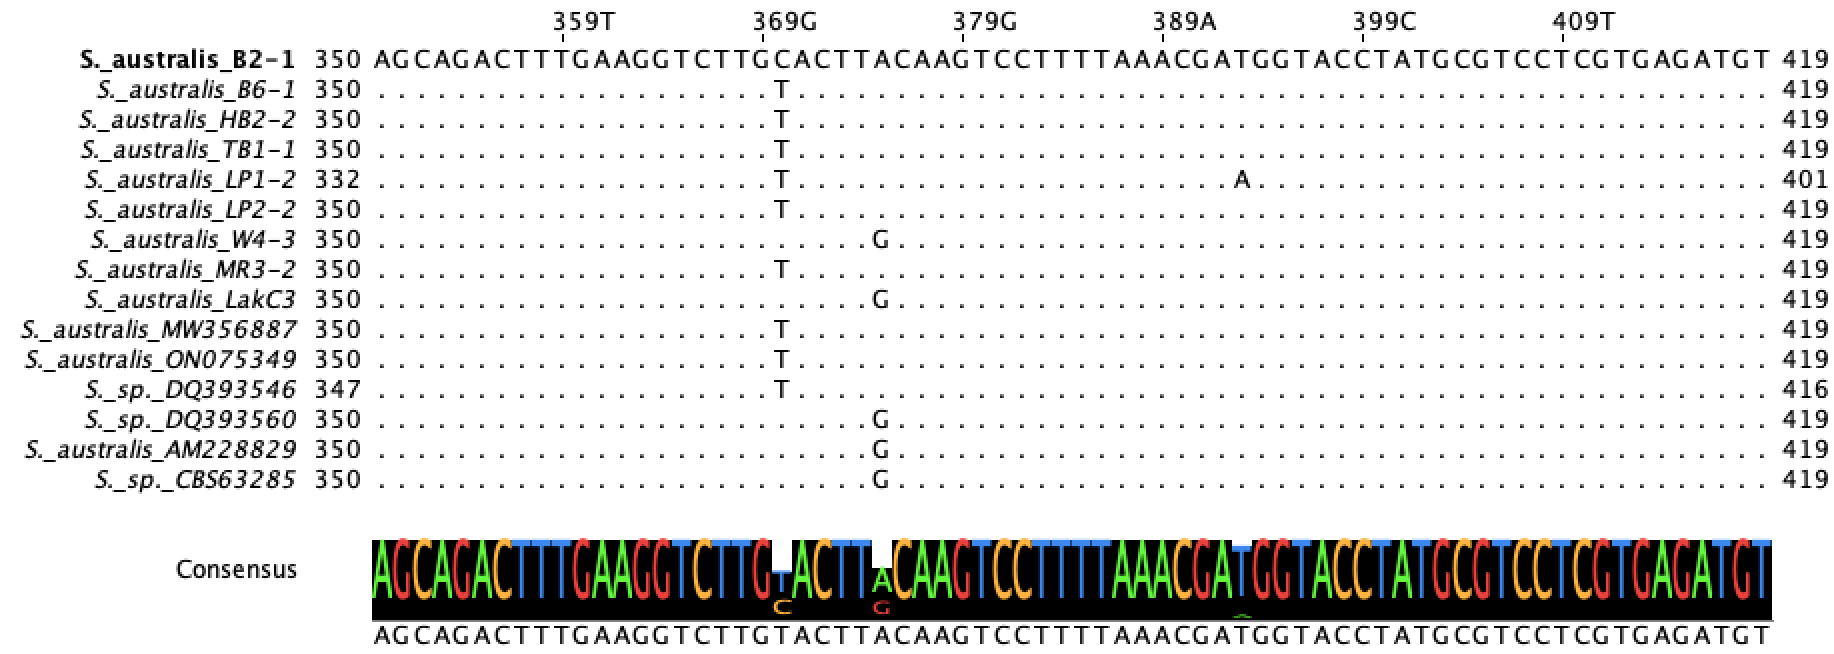


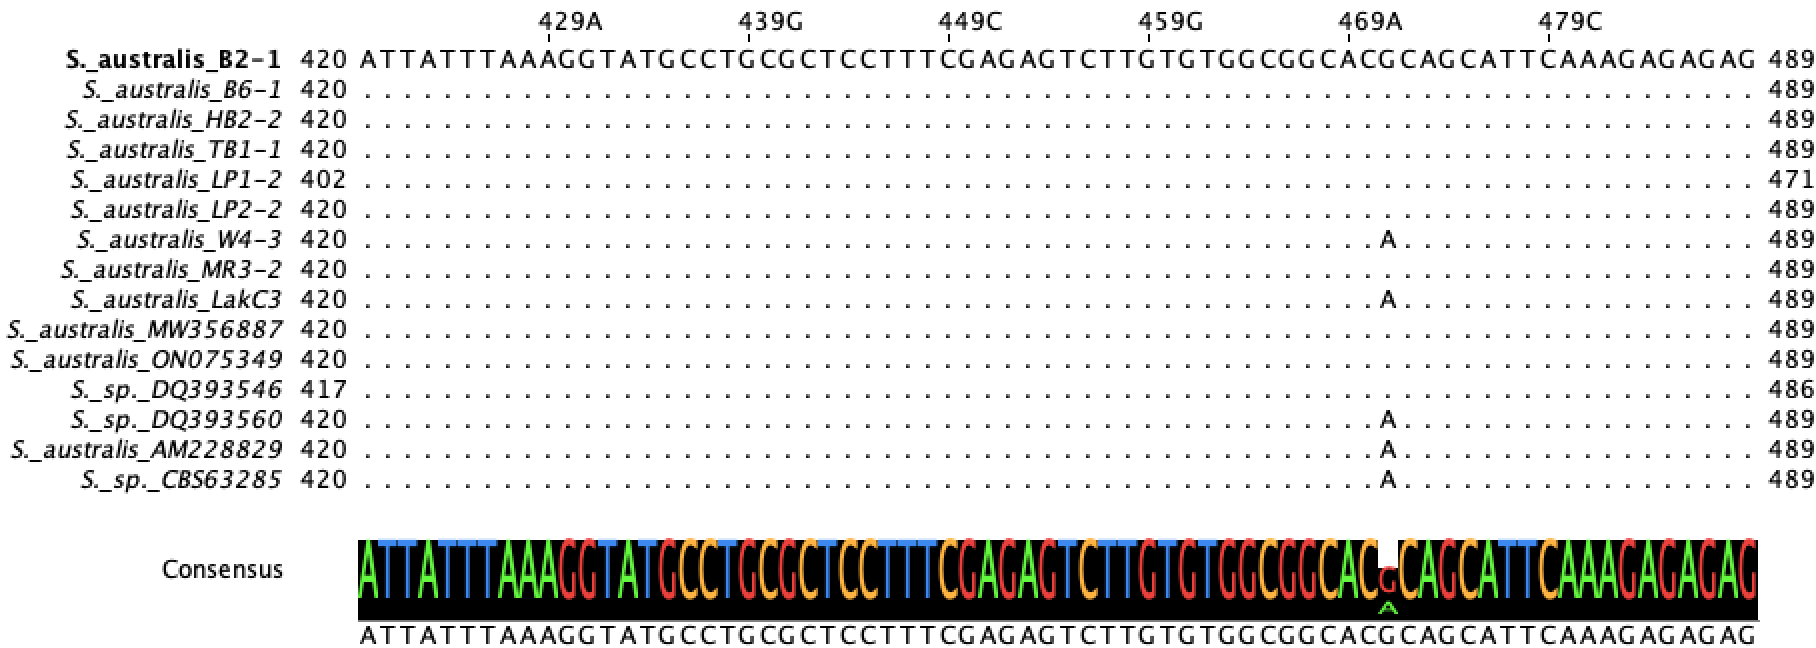


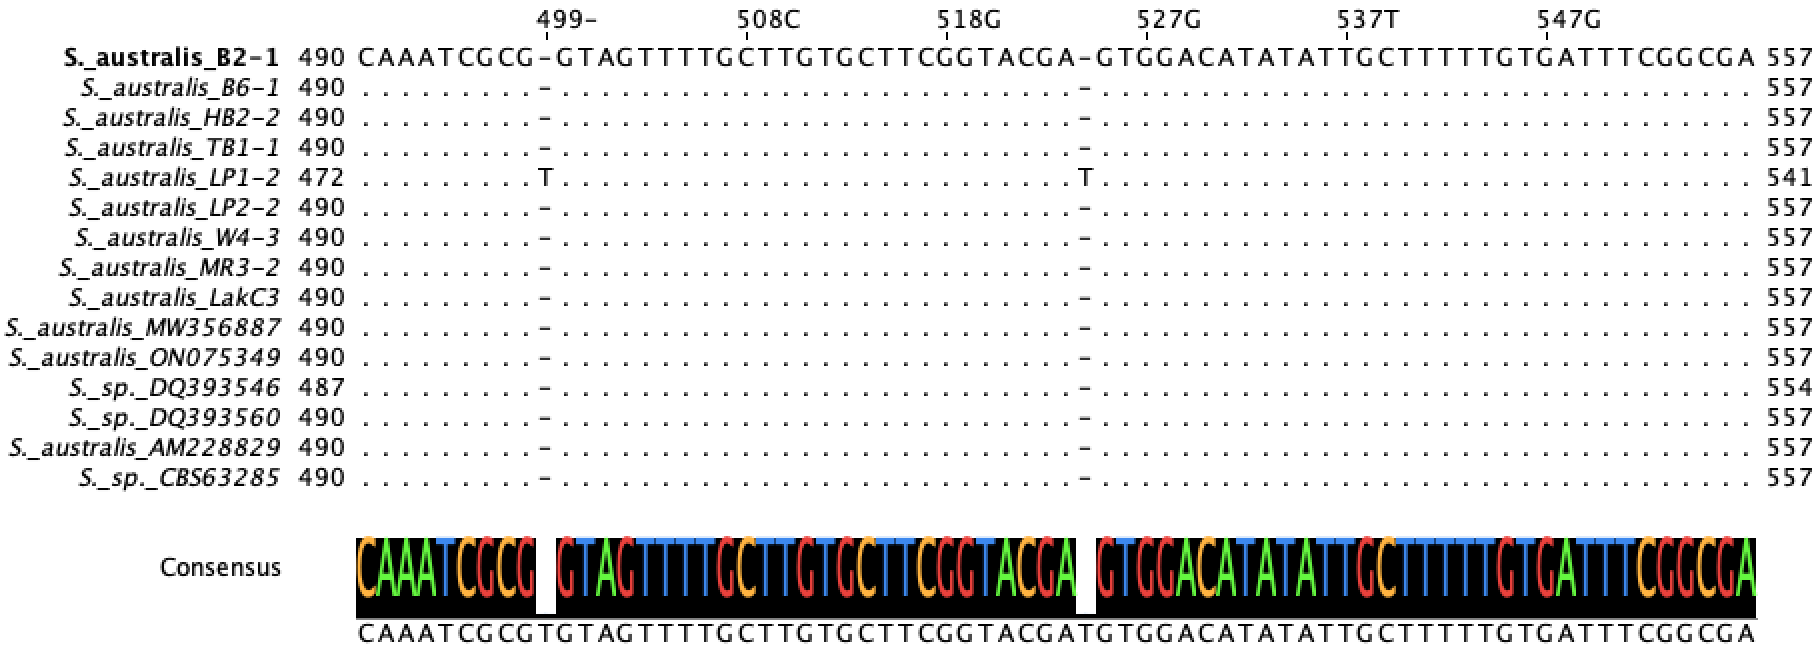


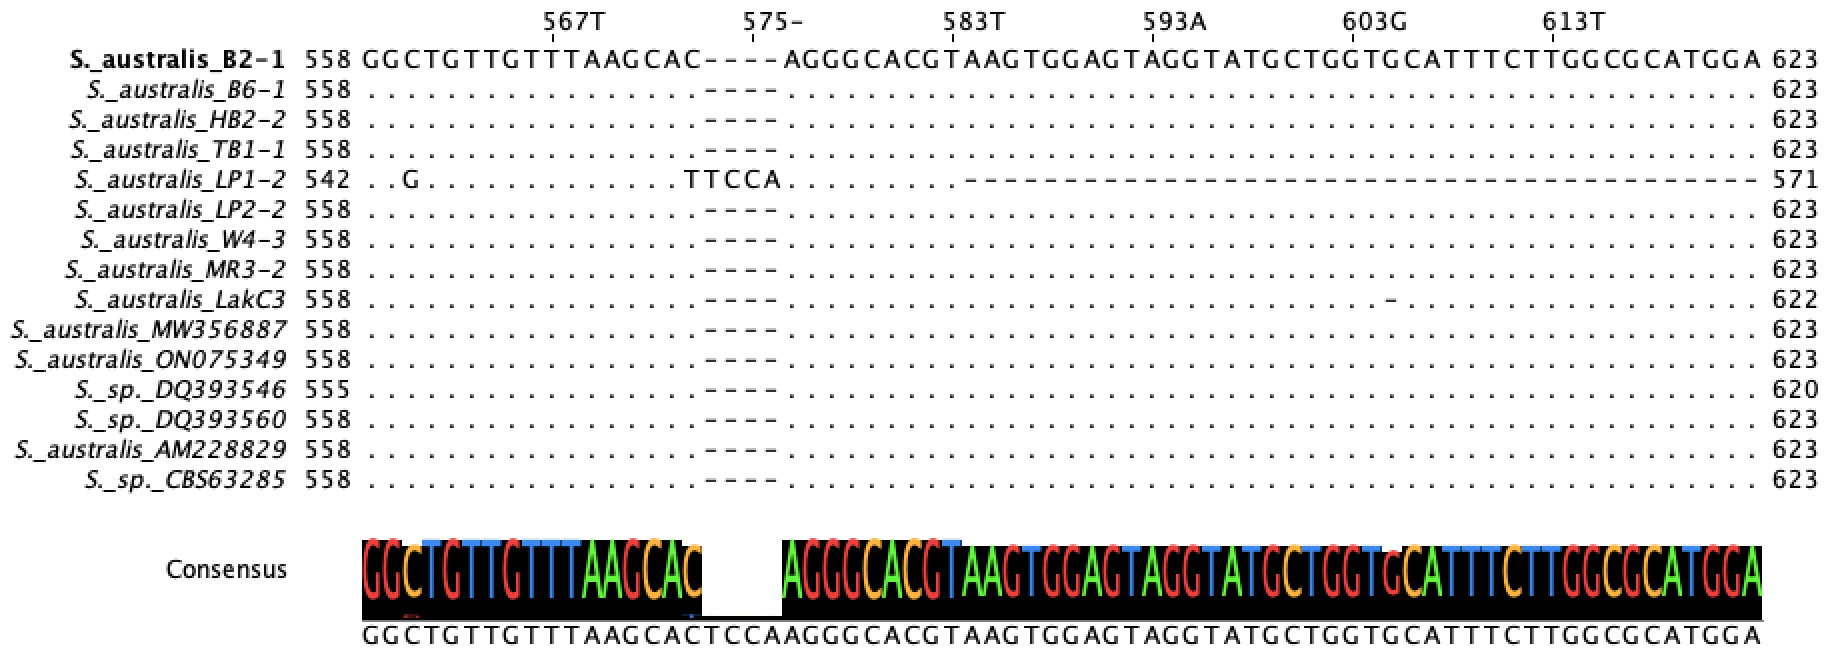


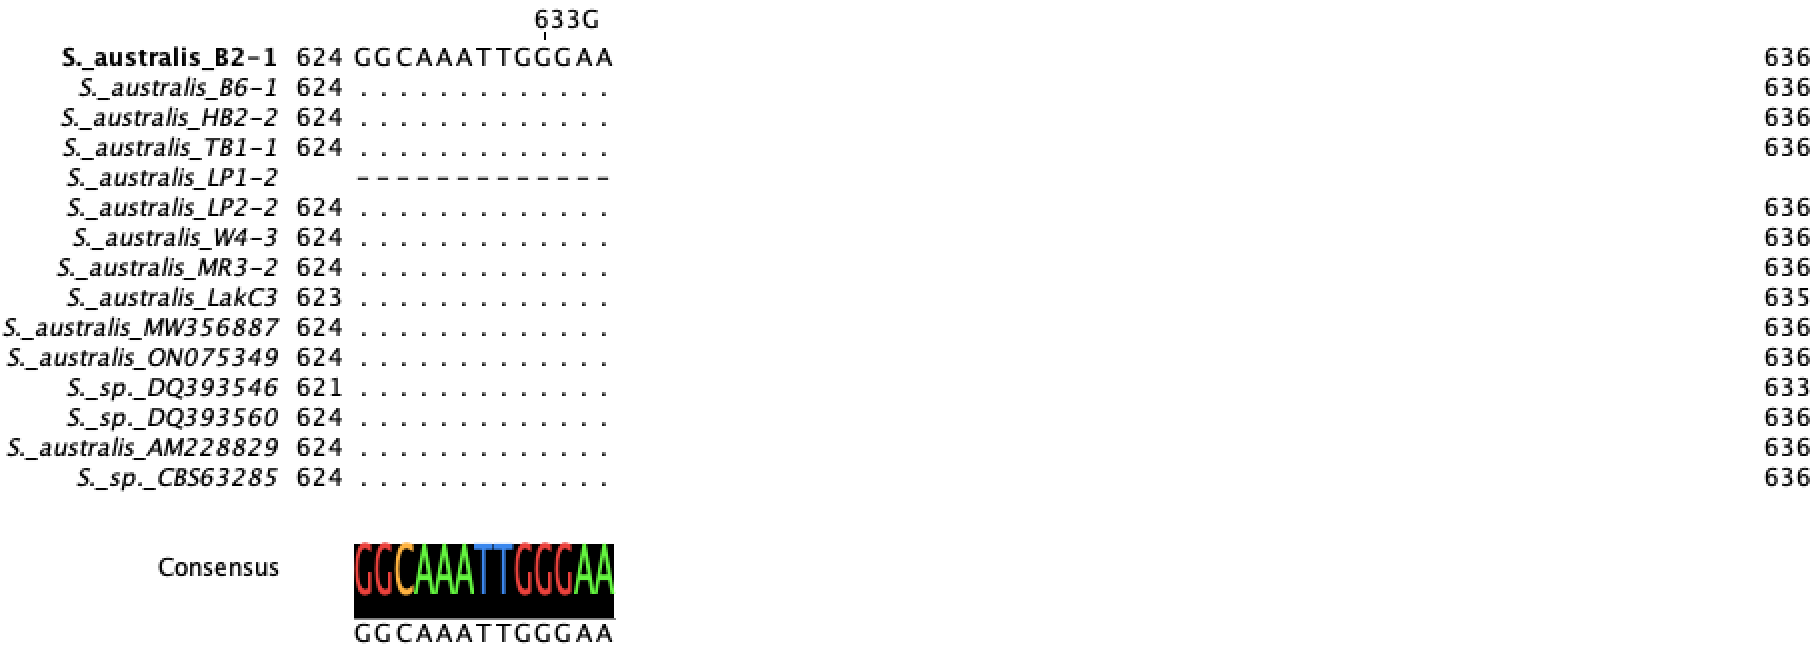


Fig. S5 Multiple sequence alignment of the ITS region for *S. australis* isolates. The alignment includes sequences from nine isolates and five reference sequence (DQ393546, ON075349, AM228829, DQ393560, and CBS63285). Dots (.) indicate nucleotides identical to the top reference sequence, while dashes (-) represent alignment gaps. Strain identifiers are listed on the left.


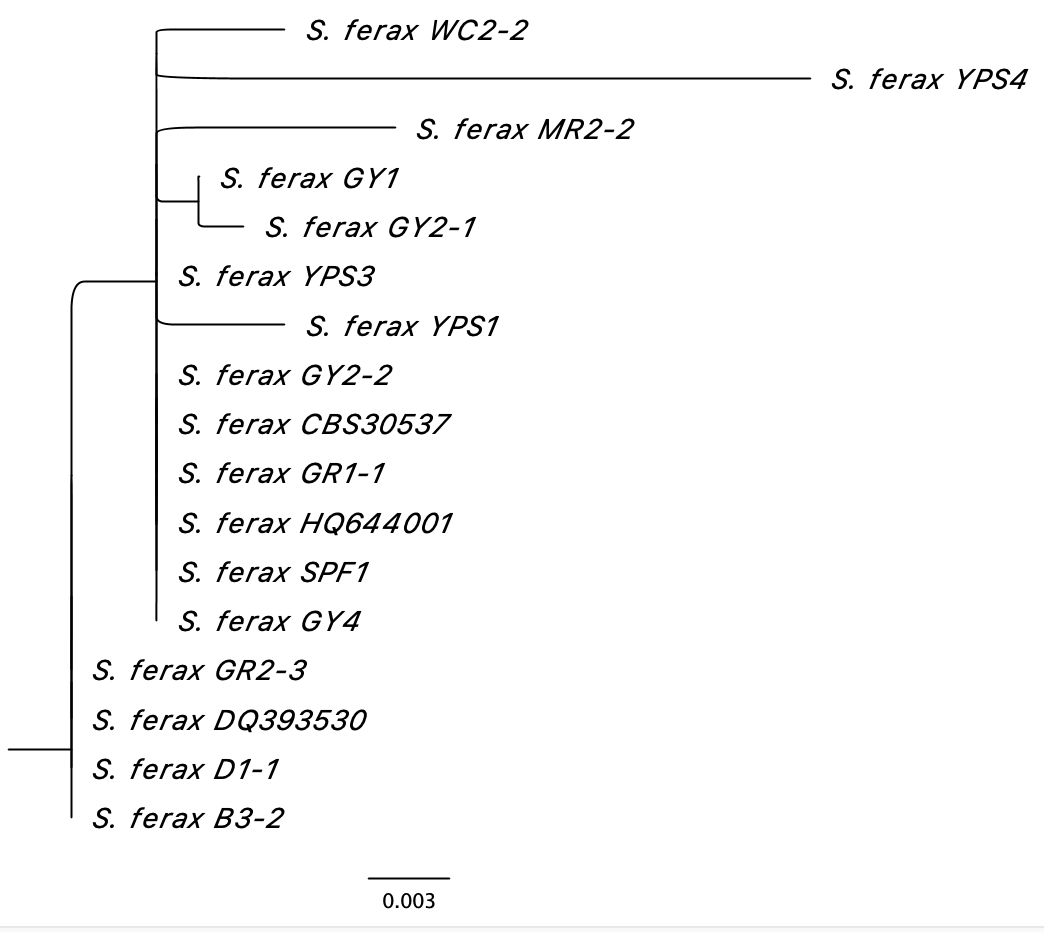


Fig. S6 Maximum-likelihood phylogeny of *Saprolegnia ferax* ITS sequences. Fourteen isolates from this study (WC2-2, YPS4, MR2-2, GY1, GY2-1, YPS3, YPS1, GY2-2, GR1-1, SPF1, GY4, GR2-3, D1-1, and B3-2) were analyzed with three reference sequences (CBS30537, HQ644001, and DQ393530) to assess intraspecific relationships with *S. ferax*.


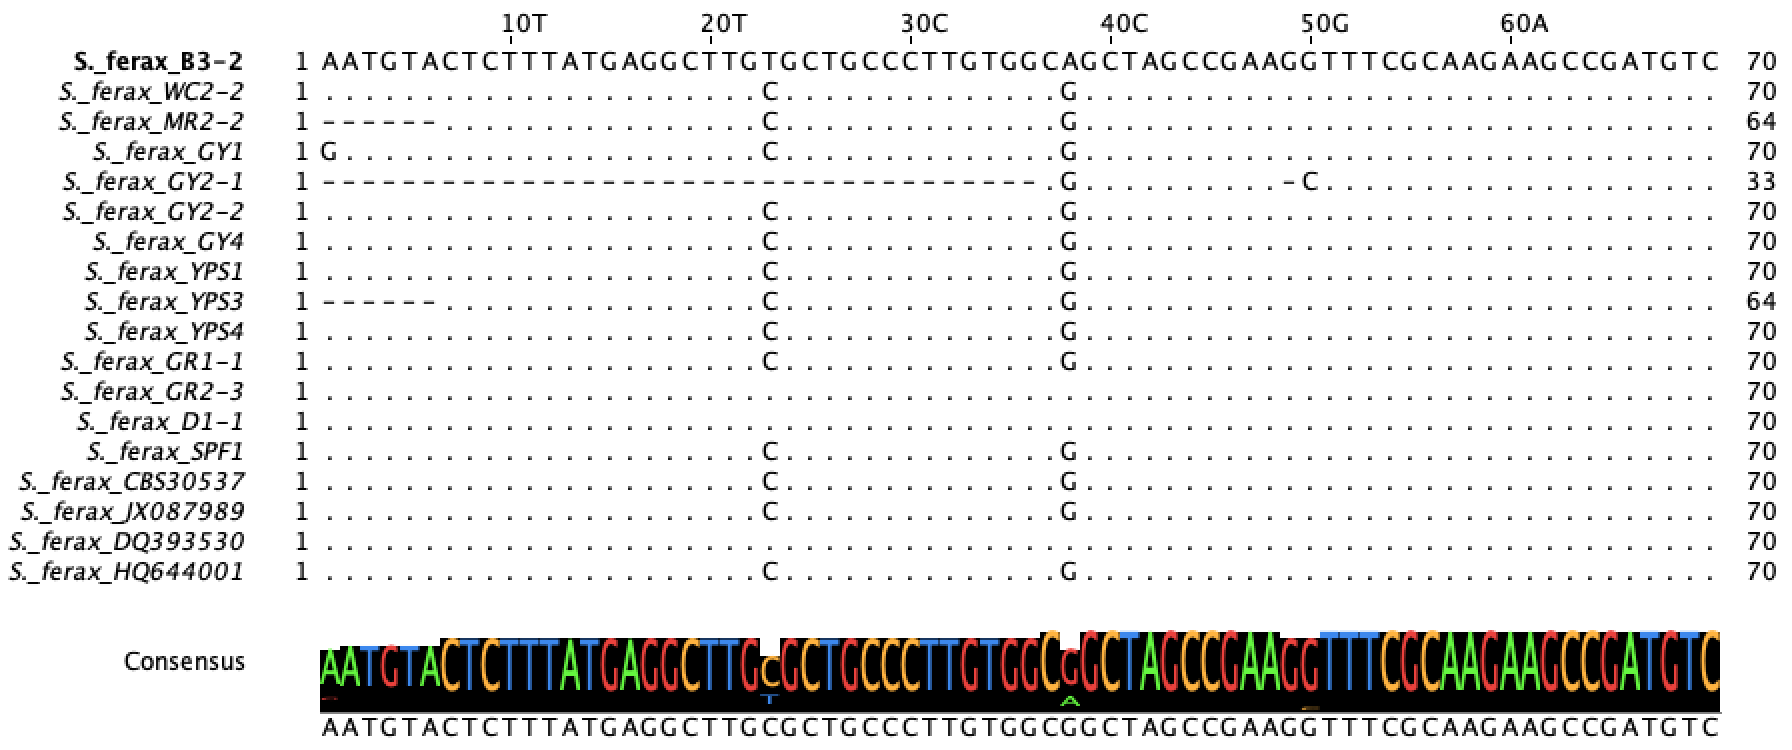


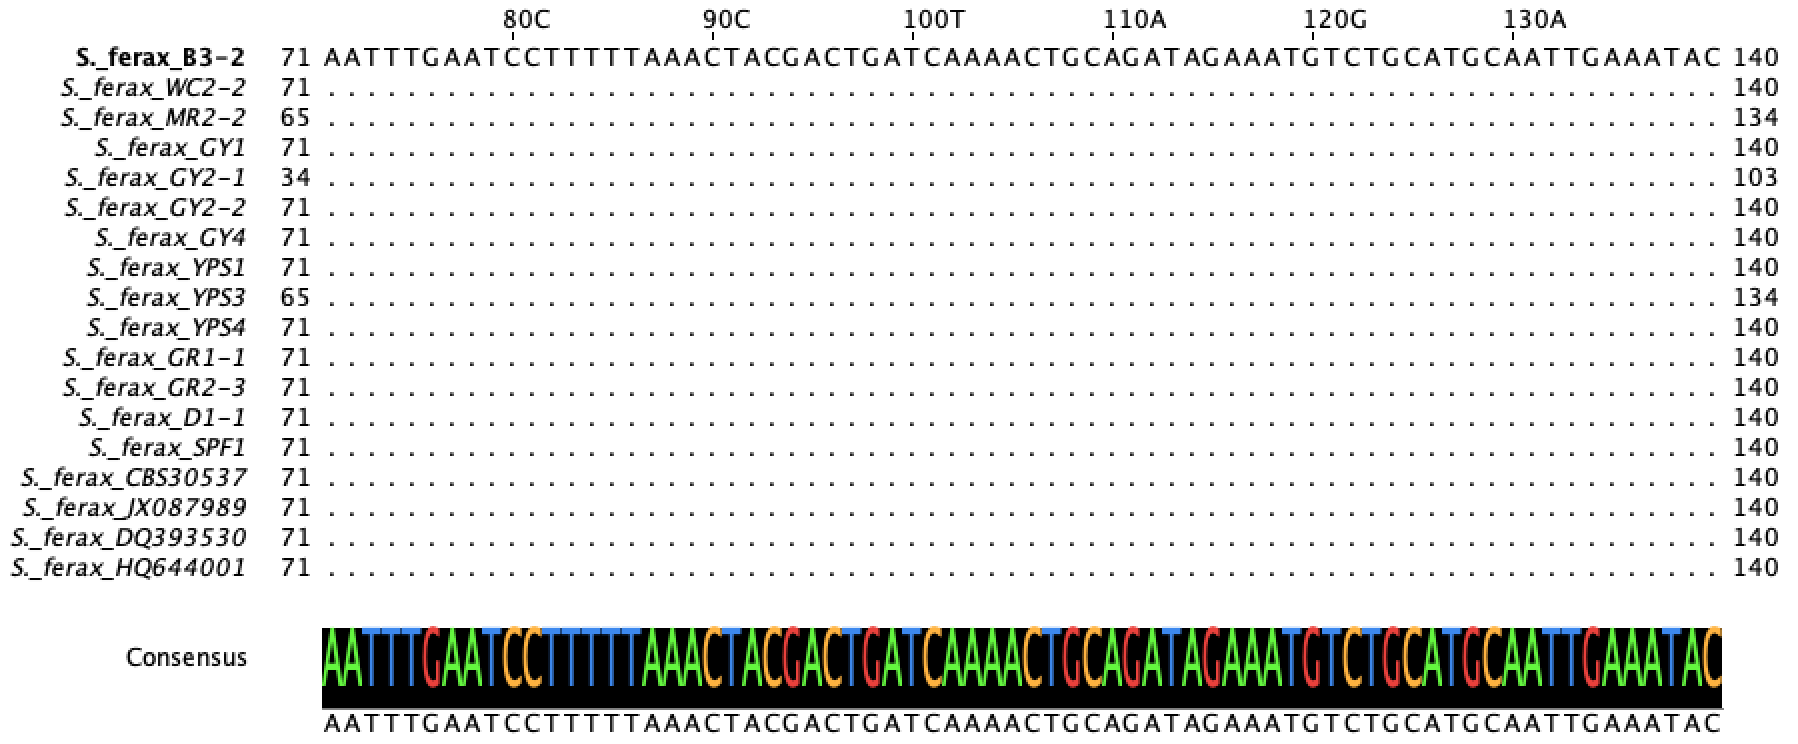


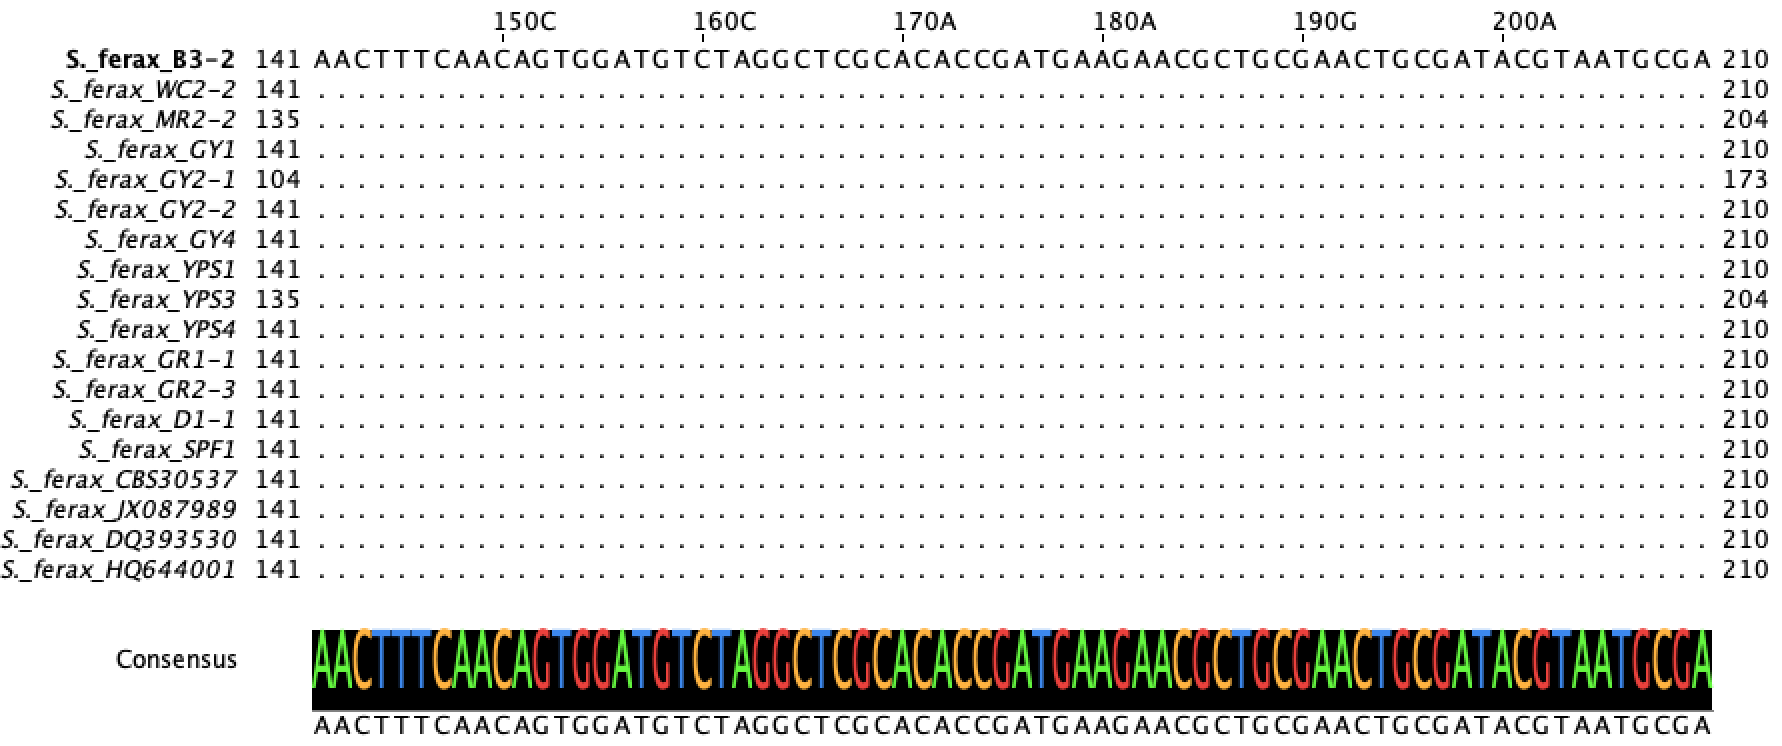


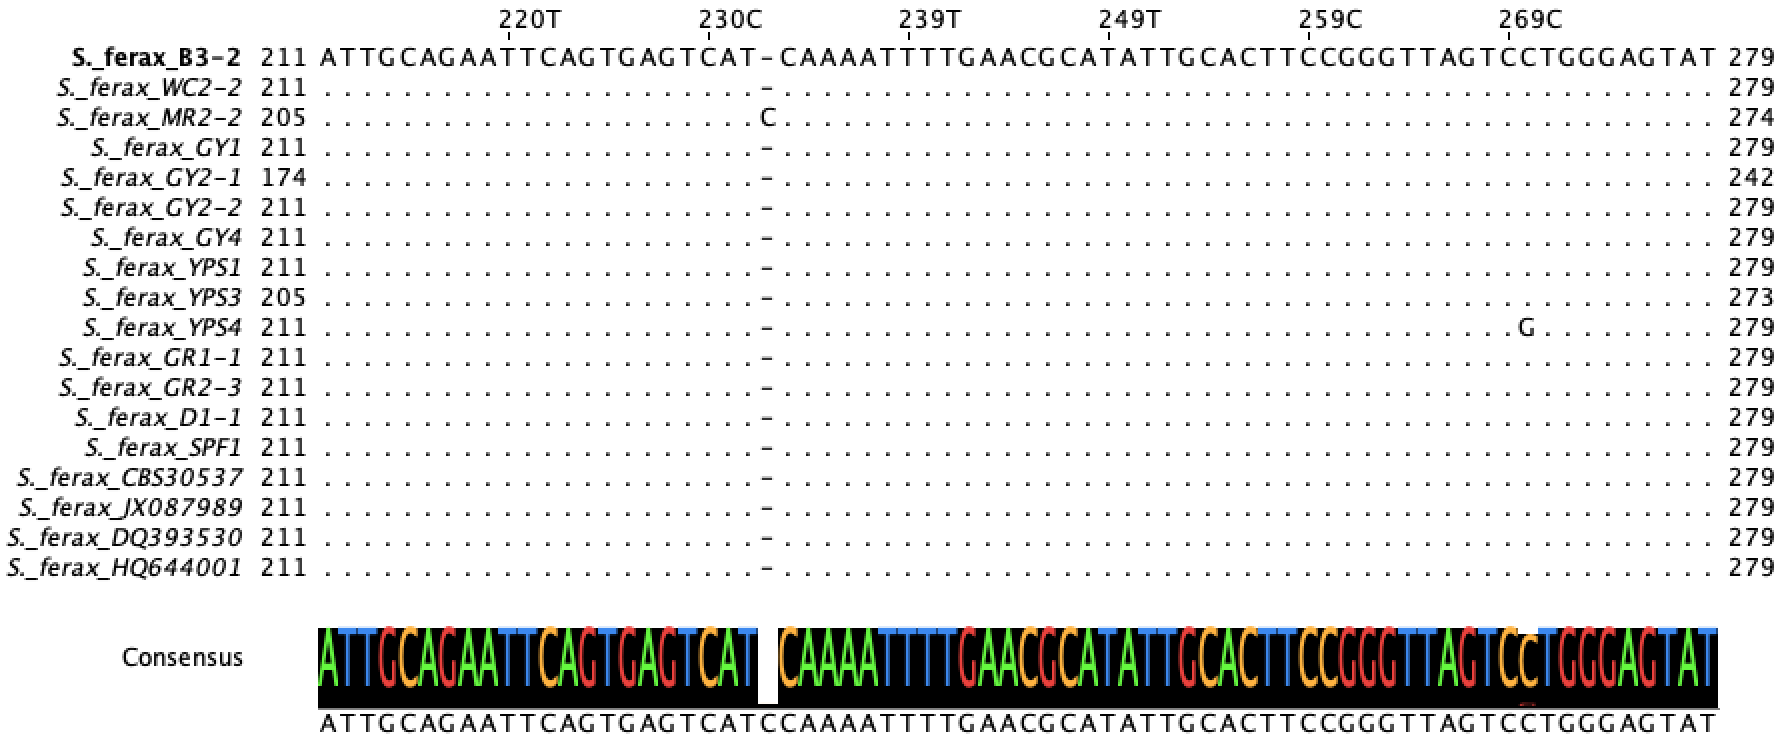


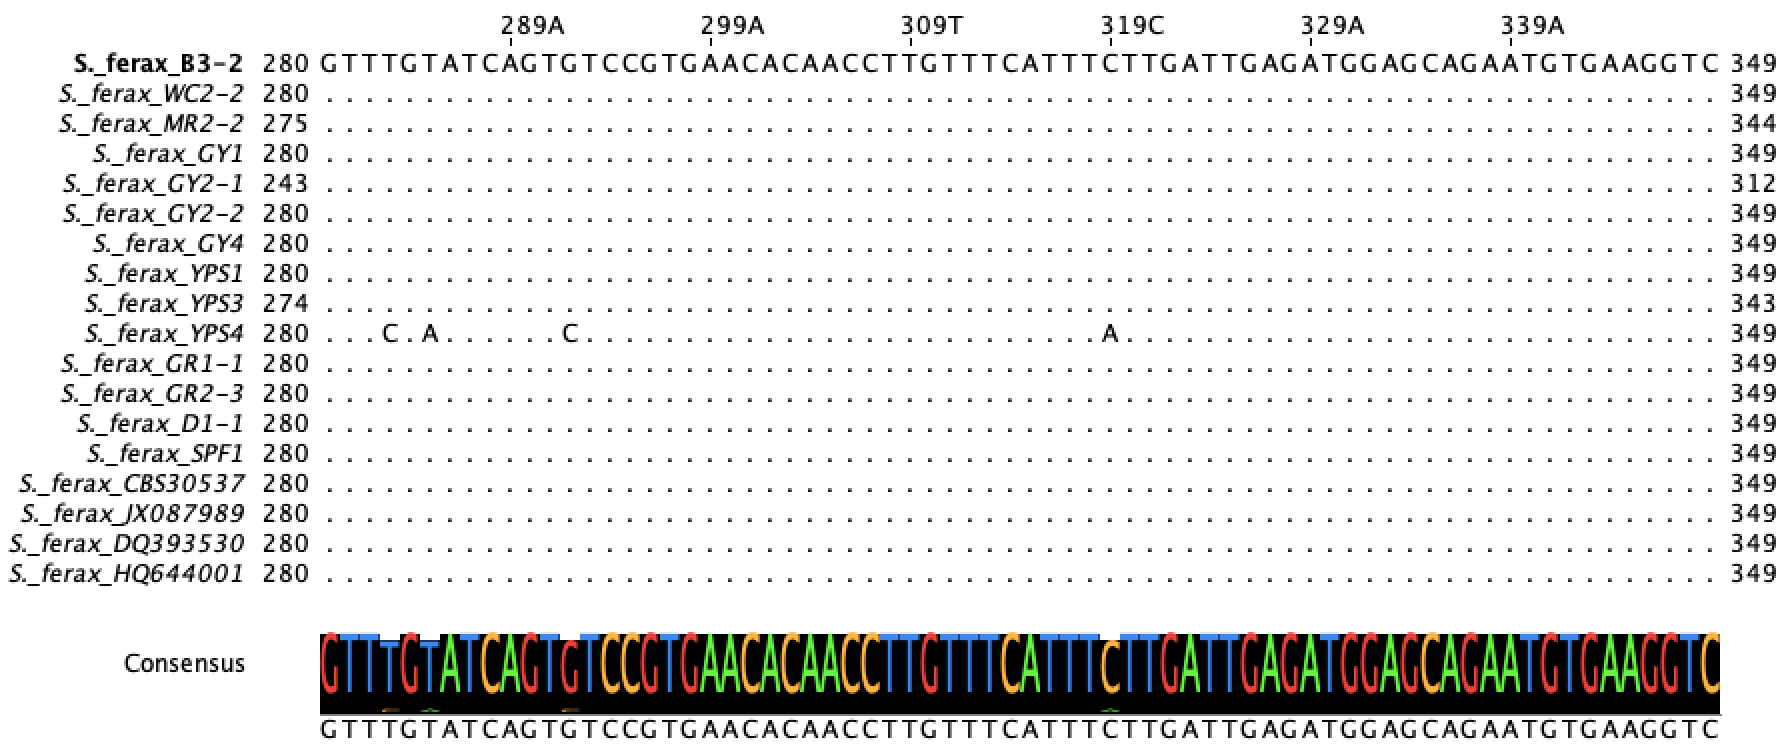


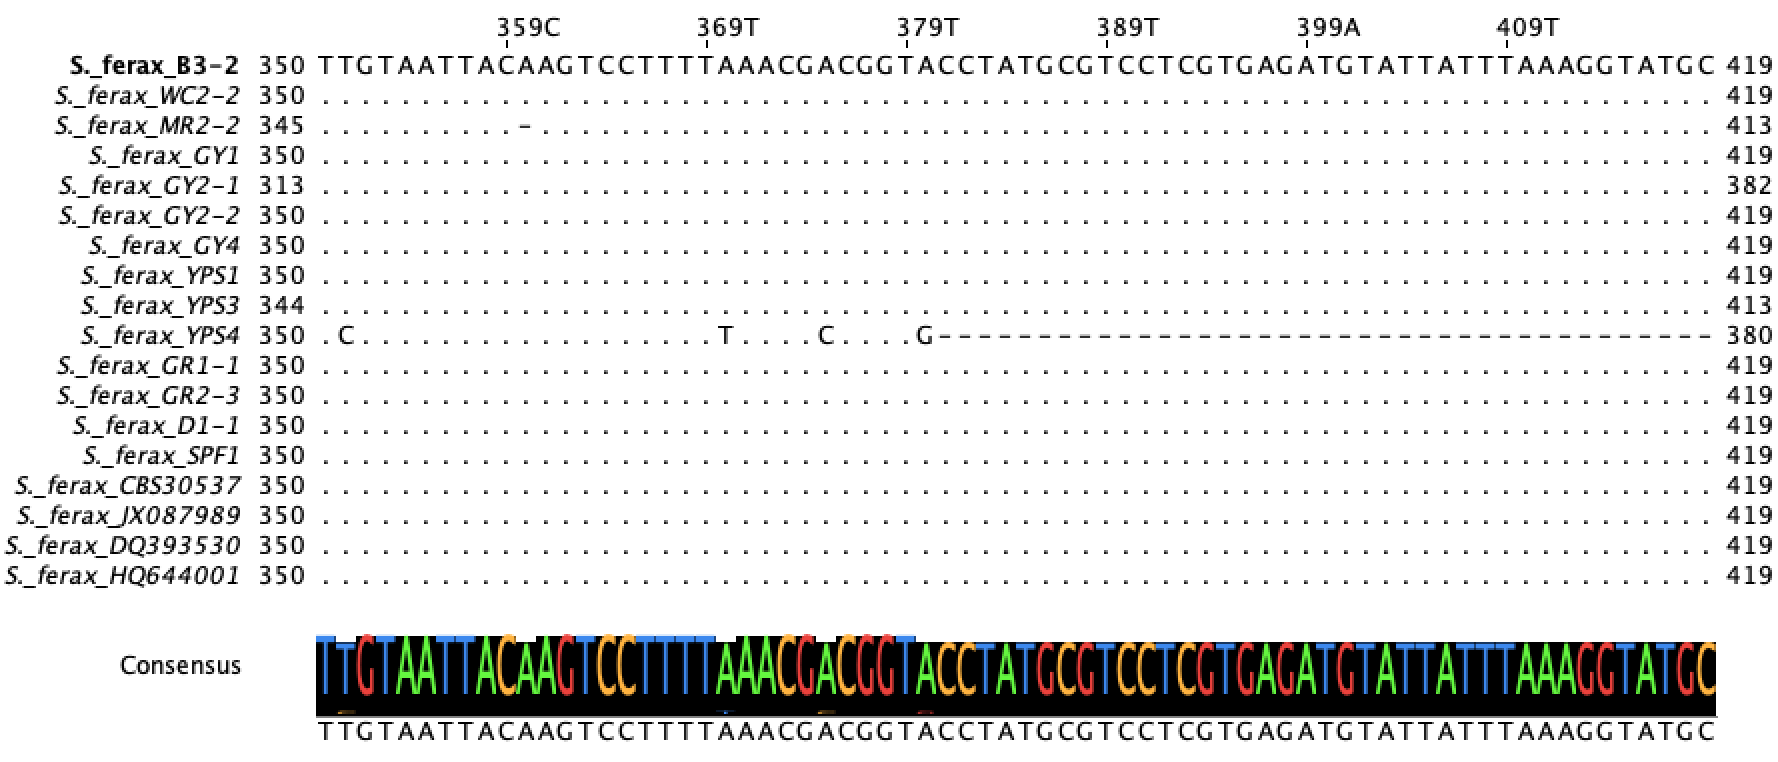


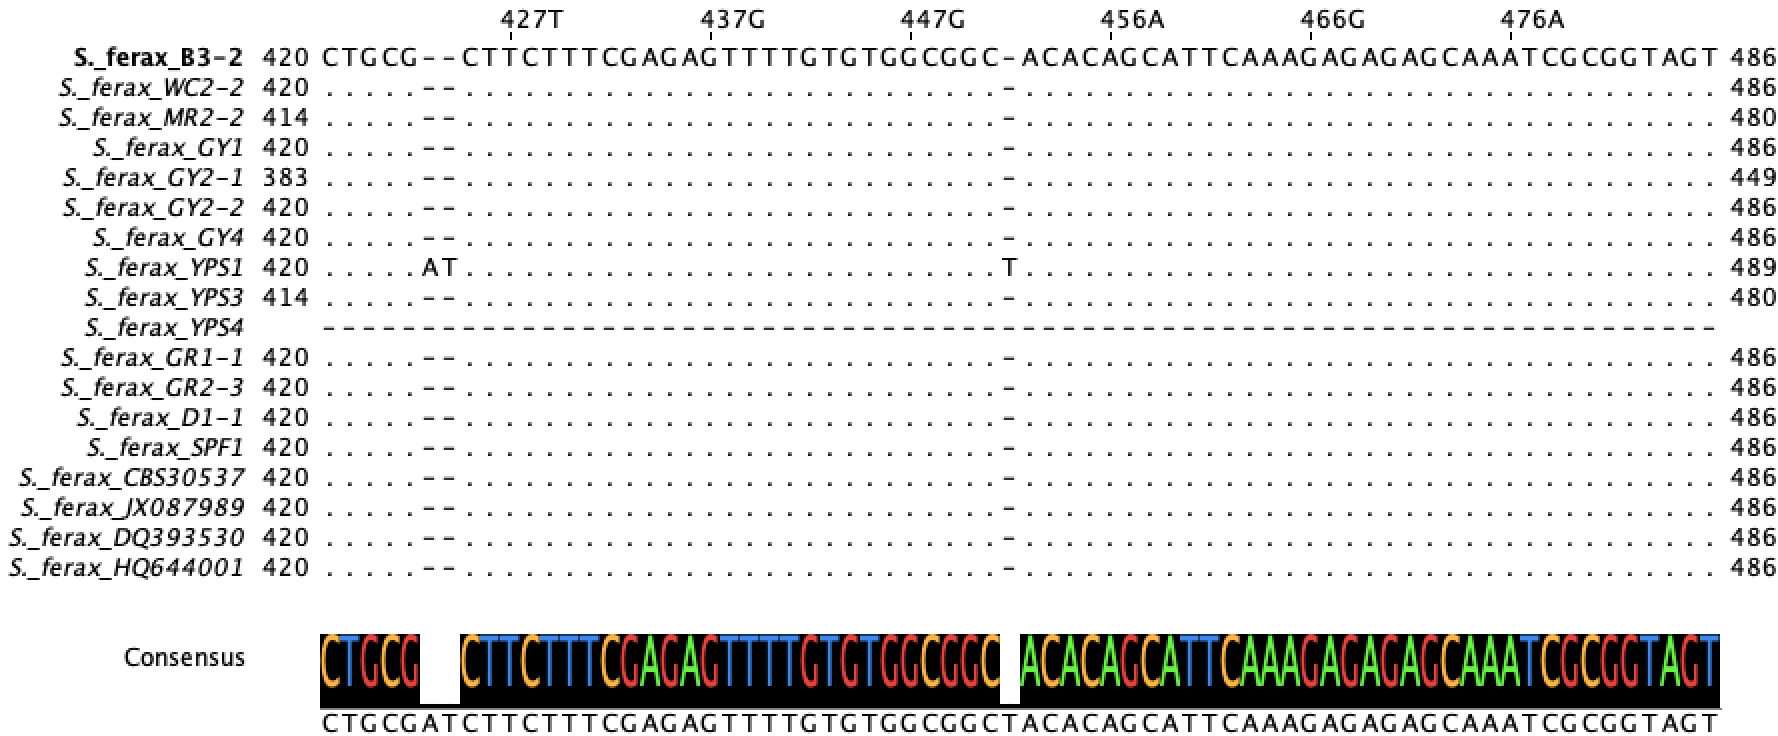


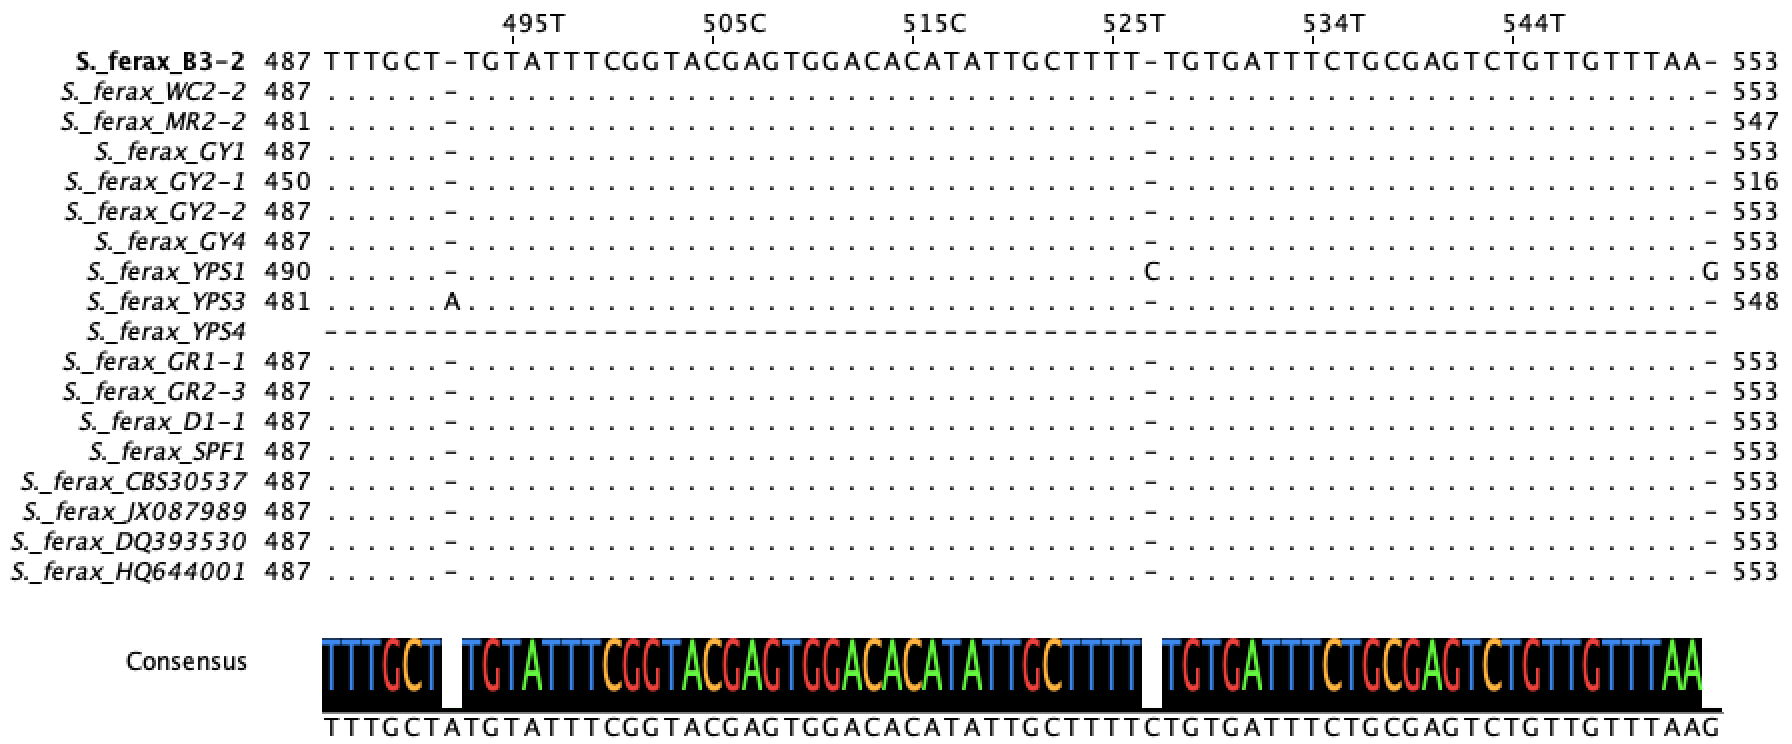


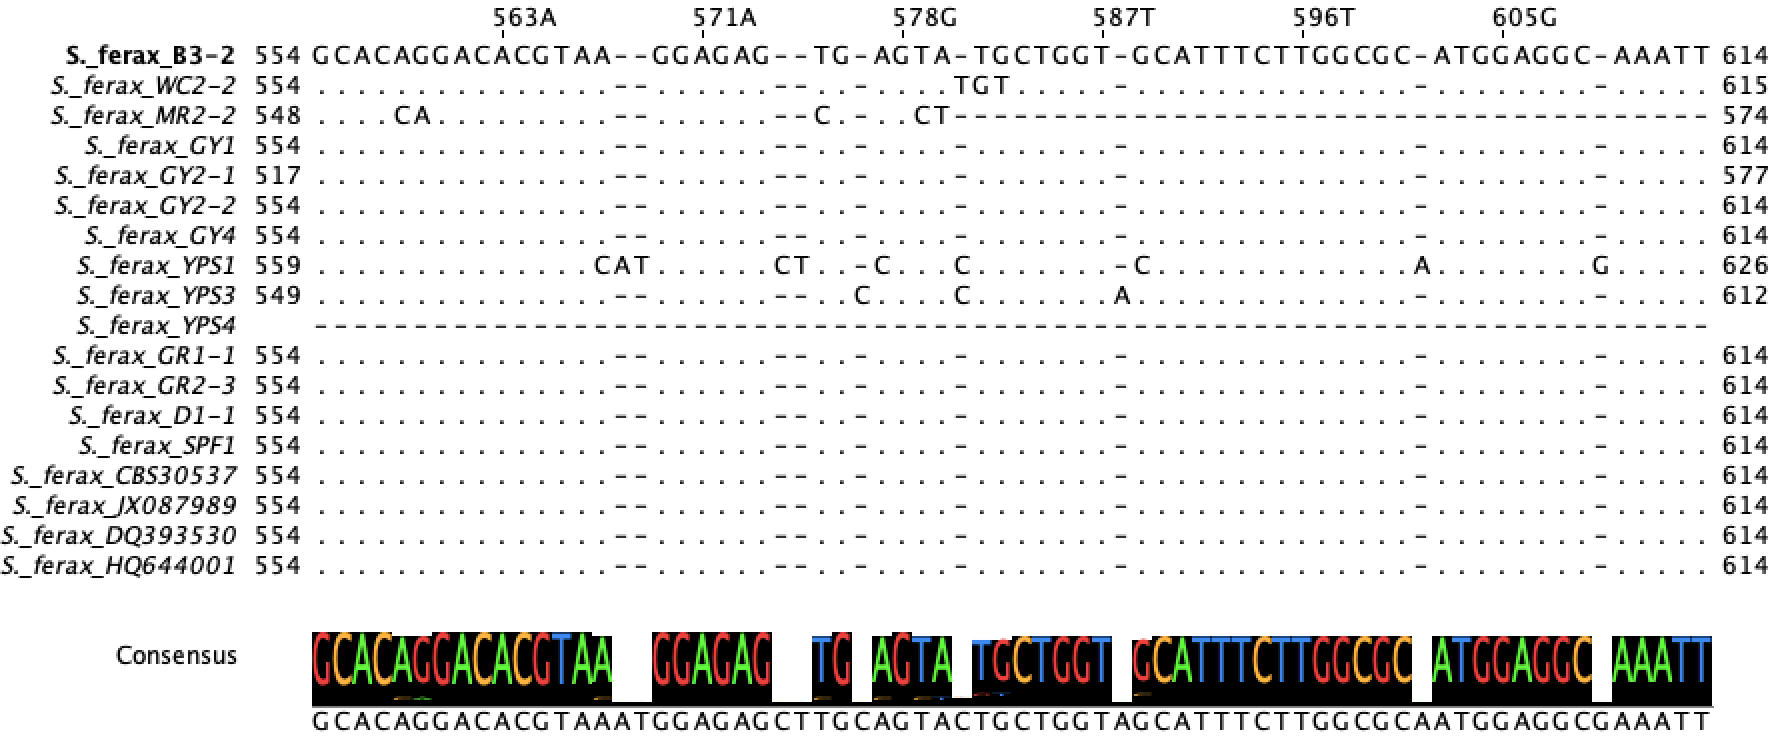


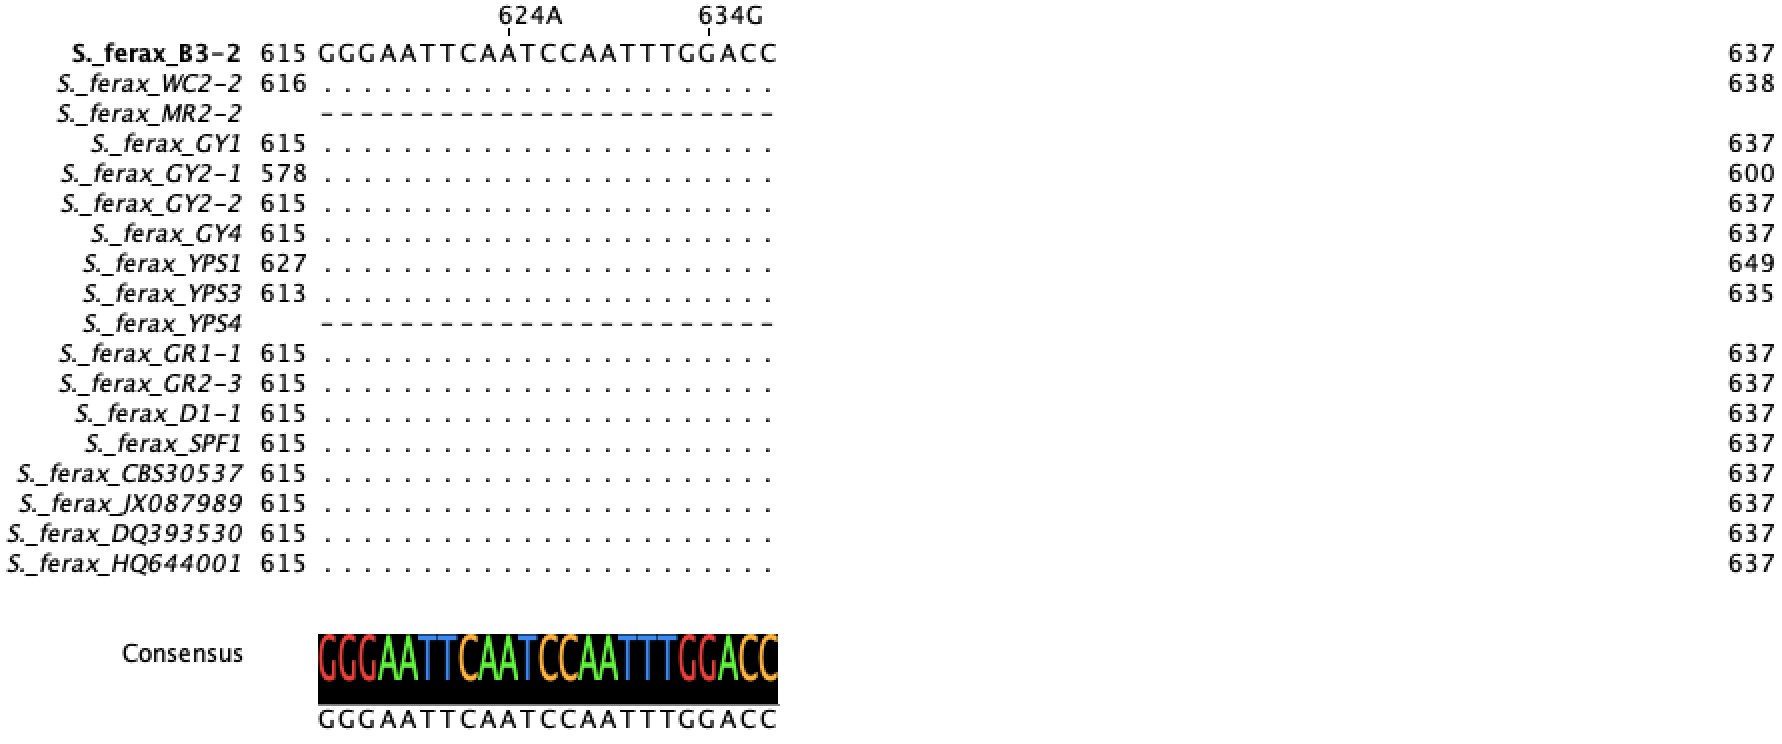


Fig. S7 Multiple sequence alignment of the ITS region for *S. ferax*. The alignment includes sequences from fourteen isolates and three reference sequences (CBS30537, HQ644001, and DQ393530). Dots (.) indicate nucleotides identical to the top reference sequence, while dashes (-) represent alignment gaps.
